# Supplementary material for: The hitchhiker's guide to dynamic ion–solvent clustering: applications in differential ion mobility spectrometry
Source: Royal Society of Chemistry journal article supplement (doi:10.1039/d2cp02540j), 2022-01-01
Supplement: d2cp02540j1.xlsx [file d2cp02540j1.xlsx]

## Sheet: Sheet1
Compound	SMILES	mz	BW_CCS	N2SV1500	N2SV2000	N2SV2500	N2SV3000	N2SV3250	N2SV3500	N2SV3750	N2SV4000	MeOHSV1500	MeOHSV2000	MeOHSV2500	MeOHSV3000	MeOHSV3250	MeOHSV3500	MeOHSV3750	MeOHSVSV4000	LogWS_pred	WS_predRange
5-Cl-MQOH	Cc1ccc2c(Cl)ccc(O)c2n1	194.04	138.66	0.1	0.1	0.3	0.5	0.90875	1.6	2.56625	3.8	-3.2	-7.3	-13.5	-20.2	-23.1	-25.3	-26.6	-27.3	-2.84	[-3.65:-2.04]
5-CN-MQOH	Cc1ccc2c(ccc(O)c2n1)C#N	185.07	132.21	0.1	0.1	-0.2	-0.3	-0.145	0.2	0.77	1.6	-3	-6.5	-12.1	-19.6	-23.5	-27.3	-30.8	-33.2	-3.28	[-3.85:-2.71]
5-F-MQOH	Cc1ccc2c(F)ccc(O)c2n1	178.07	127.47	-0.2	-0.4	-0.5	-0.3	0.0766667	0.7	1.59833	2.8	-3.8	-8.6	-15.4	-22.4	-25.1	-27.2	-28.3	-28.1	-2.24	[-2.59:-1.89]
5-Me-MQOH	Cc1ccc2c(C)ccc(O)c2n1	174.09	129.45	-0.2	-0.2	0	0.8	1.47458	2.4	3.65042	5.3	-3.7	-8.1	-13.7	-18.5	-19.9	-20.4	-20.4	-18.7	-2.95	[-3.78:-2.12]
5-NO2-MQOH	Cc1ccc2c(ccc(O)c2n1)[N+]([O-])=O	205.06	137.66	0.2	-0.1	0	-0.4	-0.34	0	0.59	1.4	-2.7	-5.9	-10.7	-17.5	-21.5	-25.2	-28.6	-31.5	-3.96	[-4.04:-3.88]
5-OMe-MQOH	COc1ccc(O)c2nc(C)ccc12	190.09	131.334	-0.1	-0.1	0.2	1.1	1.82417	2.8	4.10083	5.8	-3.7	-7.7	-12.6	-15.7	-16.6	-16.9	-15.3	-14.2	-2.9	[-3.45:-2.35]
6-amino-2-MQ	Cc1ccc2cc(N)ccc2n1	159.1	126.43	0	-0.1	0.2	1.2	2.03792	3.2	4.78708	6.9									-2.64	[-3.13:-2.15]
6-Cl-MQOH	Cc1ccc2cc(Cl)cc(O)c2n1	194.04	139.83	0.1	-0.1	-0.3	0.1	0.575417	1.3	2.34958	3.8	-3	-7	-13.3	-20.7	-24.2	-27.2	-29.6	-30.7	-3.11	[-3.86:-2.36]
6-CN-MQOH	Cc1ccc2cc(cc(O)c2n1)C#N	185.07	132.72	0.1	0	-0.8	-1.3	-1.23458	-0.9	-0.265417	0.7	-3	-6.7	-12.3	-20.1	-24.4	-28.7	-32.4	-35.6	-3.25	[-3.99:-2.51]
6-F-MQOH	Cc1ccc2cc(F)cc(O)c2n1	178.07	129.26	0	-0.3	-0.8	-0.5	-0.02875	0.7	1.75375	3.2	-3.3	-7.4	-14.1	-22.2	-25.9	-29	-31.5	-32.7	-2.24	[-2.58:-1.9]
6-Me-MQOH	Cc1cc(O)c2nc(C)ccc2c1	174.09	129.62	-0.2	-0.2	0.1	1	1.80875	2.9	4.29125	6	-3.8	-8.6	-14.4	-19.7	-21	-22	-21.5	-20.6	-2.95	[-3.79:-2.11]
6-methoxy-2-MQ	COc1ccc2nc(C)ccc2c1	174.1	128.595	0.3	0.4	0.8	2.1	3.19167	4.6	6.33333	8.4									-2.28	[-2.85:-1.71]
6-methyl-2-MQ	Cc1ccc2nc(C)ccc2c1	158.1	126.14	0.2	0.2	0.6	1.9	3.02667	4.5	6.32333	8.5									-2.09	[-2.9:-1.28]
6-nitro-2-MQ	Cc1ccc2cc(ccc2n1)[N+]([O-])=O	189.1	138.15	0.6	0	-0.8	-0.6	-0.164583	0.5	1.43958	2.7									-3.23	[-4.92:-1.54]
6-NO2-MQOH	Cc1ccc2cc(cc(O)c2n1)[N+]([O-])=O	205.06	139.37	0.2	-0.1	-0.3	-1.2	-1.2875	-1	-0.3875	0.5	-3	-6.3	-11.4	-18.5	-22.6	-26.7	-30.5	-33.8	-3.58	[-4.42:-2.6]
6-OMe-MQOH	COc1cc(O)c2nc(C)ccc2c1	190.09	132.904	-0.1	-0.1	0.2	1.2	1.97667	3	4.34833	6.1	-3.4	-7.7	-13.6	-19	-20.8	-22.1	-22.5	-21.2	-2.9	[-3.45:-2.35]
7-chloro-2-MQ	Cc1ccc2ccc(Cl)cc2n1	178.1	129.57	0.4	0.3	0.1	0.9	1.75042	2.9	4.34958	6.1									-3.34	[-4.77:-1.94]
7-Cl-MQOH	Cc1ccc2ccc(Cl)c(O)c2n1	194.04	136.88	0	0	0.1	0.7	1.36625	2.3	3.48375	4.9	-3.7	-7.4	-11	-13	-13.2	-13.1	-11.8	-10.2	-3.52	[-3.85:-3.19]
7-CN-MQOH	Cc1ccc2ccc(C#N)c(O)c2n1	185.07	130.92	0.2	0.1	-0.5	-0.4	-0.100833	0.4	1.17583	2.3	-2.7	-6	-11.5	-19.4	-23.4	-27.1	-30.4	-33	-3.32	[-4.04:-2.6]
7-F-MQOH	Cc1ccc2ccc(F)c(O)c2n1	178.07	128.01	-0.2	-0.4	-0.4	0	0.55875	1.4	2.51625	3.9	-4	-9	-15.4	-21.3	-23.4	-24.4	-24.3	-23.4	-2.6	[-3.6:-1.6]
7-Me-MQOH	Cc1ccc2ccc(C)c(O)c2n1	174.09	128.85	-0.1	-0.1	0.2	0.9	1.59458	2.6	3.95542	5.7	-3.7	-7.1	-9.9	-10.9	-10.7	-10.1	-8.4	-6	-2.88	[-3.74:-2.02]
7-NO2-MQOH	Cc1ccc2ccc(c(O)c2n1)[N+]([O-])=O	205.06	135.95	0	-0.3	-0.7	-0.65	-0.390625	0.1	0.903125	2.1	-3.2	-7.1	-11.8	-15.4	-16.7	-17.1	-16.9	-15.9	-2.38	[-2.86:-1.9]
7-OMe-MQOH	COc1ccc2ccc(C)nc2c1O	190.09	131.9	-0.1	0	0.3	1.4	2.18958	3.2	4.53542	6.3	-2.5	-4.5	-5.8	-5.8	-5.3	-4.3	-2.8	-0.8	-2.3	[-3.03:-1.57]
8-amino-2-MQ	Cc1ccc2cccc(N)c2n1	159.1	124.07	0.2	0.1	0.1	1.2	2.10375	3.3	4.89625	7									-2.5	[-2.83:-2.17]
8-chloro-2-MQ	Cc1ccc2cccc(Cl)c2n1	178.1	127.88	0.1	0.2	0.6	1.7	2.69125	4	5.60875	7.5									-3.33	[-4.76:-1.94]
8-methoxy-2-MQ	COc1cccc2ccc(C)nc12	174.1	128.2	0.2	0.5	1.2	2.6	3.78083	5.3	7.11917	9.2									-2.28	[-2.85:-1.71]
8-methyl-2-MQ	Cc1ccc2cccc(C)c2n1	158.1	127.66	0.1	0.2	0.7	1.9	3.01625	4.5	6.30875	8.4									-2.23	[-3.34:-1.12]
8-nitro-2-MQ	Cc1ccc2cccc(c2n1)[N+]([O-])=O	189.1	130.62	-0.1	-0.2	-0.2	0.5	1.29208	2.4	3.80792	5.5									-3.25	[-4.95:-1.55]
A1a	Cn1ccc(NC(=O)Nc2cccc(c2)[N+]([O-])=O)n1	262.09	160.242	0.7	1.2	2	3.3	4.07542	5	6.17458	7.7	0.3	0.5	0.8	1.5	2	2.8	3.8	7.5	-3.87	[-4.65:-3.09]
A1b	Cn1nccc1NC(=O)Nc2cccc(c2)[N+]([O-])=O	262.09	158.213	0.8	1.4	2.3	3.7	4.53458	5.5	6.66542	8.1	-0.6	-1.6	-3	-4.4	-4.9	-5.4	-5.6	-5.9	-3.87	[-4.65:-3.09]
A2a	[O-][N+](=O)c1ccc(NC(=O)Nc2ccccn2)cc1	259.1	163.229	0.7	1.3	2.3	3.8	4.75042	5.9	7.32458	9.1	-1.7	-4	-6.2	-7.3	-7.2	-7.3	-6.2	-4.8	-3.84	[-4.48:-3.2]
A2b	[O-][N+](=O)c1ccc(NC(=O)Nc2ccncc2)cc1	259.1	166.649	1	1.3	2.3	3.7	4.64125	5.8	7.20875	8.9	-1.9	-4.9	-8	-10.2	-10.3	-10.4	-9.9	-9.3	-3.73	[-4.46:-3]
A3a	S=C(N\N=C\c1ccccn1)Nc2ccccn2	258.1	155.42	1	1.5	2.5	4	4.84375	5.8	6.95625	8.4	0	-0.4	-2.1	-3.6	-4.4	-5.2	-6.3	-6.5	-4.01	[-4.56:-3.46]
A3b	S=C(N/N=C/c1ccccn1)Nc2ccncc2	258.1	162.114	1	1.7	2.9	4.4	5.31875	6.4	7.68125	9.2	-0.5	-1.1	-1.9	-2.8	-3.5	-4.1	-4.6	-5.2	-3.74	[-4.38:-3.1]
A4a	CCOC(=O)c1ccc(NC(=O)Nc2ccccn2)cc1	286.1	175.745	0.4	0.8	1.4	2.3	2.99542	3.9	5.02958	6.4									-4.17	[-4.75:-3.59]
A4b	CCOC(=O)c1ccc(NC(=O)Nc2cccnc2)cc1	286.1	178.953	0.6	1	1.7	2.4	2.70292	3.1	3.74708	4.8									-4.12	[-4.7:-3.54]
A4c	CCOC(=O)c1ccc(NC(=O)Nc2ccncc2)cc1	286.1	178.693	0.5	0.8	1.3	1.8	2.2925	3	3.9075	5									-4.13	[-4.71:-3.55]
A5a	Cc1onc(c1NC(=O)Nc2ccccn2)c3c(Cl)cccc3Cl	364	177.505	0.8	1.3	2.2	3.4	4.12458	5	6.10042	7.5	-0.3	-0.7	-1.2	-1.9	-2.4	-3.1	-3.8	-4.7	-4.51	[-5.73:-3.29]
A5b	Cc1onc(c1NC(=O)Nc2ccncc2)c3c(Cl)cccc3Cl	364	180.885	0.8	1.3	2.2	3.4	4.09833	4.9	5.85167	7	0	-0.3	-0.9	-1.5	-1.8	-2.1	-2.5	-3	-4.39	[-5.65:-3.13]
A6a	FC(F)(F)c1n(ncc1NC(=O)Nc2ccccn2)c3ccccc3	348.1	175.361	0.7	1.2	2.1	3.4	4.2125	5.2	6.4375	8									-4.9	[-5.84:-4]
A6b	FC(F)(F)c1n(ncc1NC(=O)Nc2cccnc2)c3ccccc3	348.1	178.656	0.8	1.3	2.1	3.2	3.75958	4.4	5.24042	6.4									-4.82	[-5.89:-3.75]
B2a	CCOC(=O)Nc1ccccc1C(=O)N2CCCCC2	277.16	163.174	0.7	1.3	2.5	4.2	5.325	6.7	8.375	10.4	-1.2	-2.8	-4.8	-6.5	-6.8	-6.7	-6.1	-4.8	-3.34	[-4.13:-2.55]
B2b	CCOC(=O)Nc1ccc(cc1)C(=O)N2CCCCC2	277.16	169.025	0.9	1.5	2.4	3.4	4.03708	4.9	6.11292	7.8	-0.5	-1.4	-3	-5.1	-6.5	-8.3	-10.4	-12.6	-2.76	[-3.61:-1.91]
B3a	CN(Cc1ccccc1)C(=O)c2ccccc2NC(=O)c3occc3	335.1	171.452	0.8	1.4	2.5	4.3	5.44958	6.8	8.40042	10.3	-0.4	-1.1	-2	-2.6	-2.5	-2.2	-1.4	-0.2	-5.29	[-6.62:-4.26]
B3b	CN(Cc1ccccc1)C(=O)c2cccc(NC(=O)c3occc3)c2	335.1	184.489	0.8	1.5	2.5	4	4.83083	5.8	7.04417	8.7	0.5	1	1.8	3	3.7	4.5	5.3	6.8	-4.94	[-5.68:-4.26]
B4a	O=C(N1CCCC1)c2ccccc2N[S](=O)(=O)c3ccc4ccccc4c3	381.1	191.673	0.8	1.3	2.2	3.5	4.40167	5.5	6.79833	8.3	-1	-2.7	-4.6	-6.3	-6.9	-7.4	-7.2	-6.9	-5.18	[-6.82:-3.54]
B4b	O=C(N1CCCC1)c2cccc(N[S](=O)(=O)c3ccc4ccccc4c3)c2	381.1	183.765	0.9	1.7	2.8	4.4	5.37917	6.5	7.79583	9.3	0	0	0.3	1.1	1.6	2.5	3.4	4.3	-5.06	[-6.76:-3.36]
C1a	FC(F)(F)Oc1ccc(CNC(=O)C2=CC=CN(Cc3ccccc3)C2=O)cc1	403.13	189.092	0.3	0.8	1.2	1.3	1.74167	2.5	3.48333	4.6	-2.3	-4.9	-8.4	-12	-13.7	-14.8	-15.6	-16.1	-5.38	[-7.68:-3.08]
C1b	FC(F)(F)Oc1ccc(CNC(=O)C2=CN(Cc3ccccc3)C(=O)C=C2)cc1	403.13	184.983	0.6	1.1	1.8	2	2.22708	2.7	3.49792	4.7	-1.9	-4.5	-7.8	-11.6	-13.8	-16	-18.8	-21.7	-5.31	[-7.6:-3.02]
C2a	CCCCN1CCC(CC1)CNC(=O)C2=CC(=CNC2=O)Cl	326.16	170.039	0.2	0.2	0.2	0.1	0.304583	0.7	1.22042	1.8	-4.6	-7.8	-11.1	-12.7	-13.7	-14.2	-14.3	-13.9	-3.63	[-4.71:-2.55]
C2b	CCCCN1CCC(CC1)CNC(=O)C2=CNC(=O)C(=C2)Cl	326.16	172.786	0.3	0.4	0.4	0.4	0.808333	1.5	2.36667	3.3	-0.8	-2.2	-4.3	-6.7	-7.9	-8.9	-9.7	-10.3	-4.02	[-4.8:-3.24]
C3a	FC(F)(F)c1ccc(nc1)N2CC(C2)NC(=O)C3=CN(Cc4ccccc4)C=CC3=O	429.15	206.318	0.4	0.9	1.7	2.6	3.30708	4.3	5.64292	7.4	-0.2	0	-2.7	-3.4	-3.5	-3.6	-3.5	-2.6	-5.08	[-6.17:-4]
C3b	FC(F)(F)c1ccc(nc1)N2CC(C2)NC(=O)C3=CN(Cc4ccccc4)C(=O)C=C3	429.15	201.176	0.4	0.6	1	1.7	2.37083	3.3	4.47917	5.9	-1.4	-3.7	-7.5	-12.9	-16.1	-19.2	-22.2	-24.9	-5.16	[-6.23:-4.09]
C4a	NC(=N)c1ccc(CNC(=O)C2=CC=CN(Cc3cccc(c3)C(F)(F)F)C2=O)cc1	429.15	196.354	0.4	0.8	1.4	2.3	2.99542	3.9	5.02958	6.4	-1.2	-2.9	-4.5	-5.7	-5.8	-5.6	-5.1	-4.5	-2.15	[-3.6:-0.7]
C4b	NC(=N)c1ccc(CNC(=O)C2=CN(Cc3cccc(c3)C(F)(F)F)C(=O)C=C2)cc1	429.15	198.585	0.6	1	1.7	2.4	2.70292	3.1	3.74708	4.8	-1	-2.4	-4.2	-6.1	-7.3	-8.1	-10.2	-12.1	-2.15	[-3.6:-0.7]
C5a	O=C(NC(Cc1ccccc1)c2ccncc2)C3=CC=CN(Cc4ccccc4)C3=O	410.19	215.773	0.7	1.3	2.2	3.7	4.61792	5.7	7.03208	8.7	-0.6	-1.5	-2.3	-2.5	-2.3	-1.6	-0.7	0.6	-6.17	[-7.06:-5.28]
C5b	O=C(NC(Cc1ccccc1)c2ccncc2)C3=CN(Cc4ccccc4)C(=O)C=C3	410.19	216.657	0.9	1.1	1.9	3	3.71375	4.6	5.71125	7.1	-0.6	-1.5	-3	-5.1	-6.4	-8	-9.6	-11.3	-5.87	[-6.8:-4.94]
CRG1a	CN(C(=O)C=C)c1ccccc1	162.1	129.081	0.4	1	2	3.5	4.9925	6.6	7.7075	7.7	-4	-8.3	-13.5	-26.3	-31.3429	-34.6	-36.4571	-37.3	-1.54	[-2.52:-0.82]
CRG1b	C=CC(=O)Nc1ccccn1	149.1	123.988	-0.3	-1.1	-1.5	-1.1	-0.479583	0.5	1.90458	3.8	-5.4	-12.1	-20.4	-27	-28.9233	-29.8	-29.6267	-28.4	-1.88	[-2.53:-1.26]
CRG1d	COc1ccc(NC(=O)C=C)cc1	178.1	135.22	0.7	1.1	2.1	3.8	4.60833	6	8.79167	13.8	-3.6	-8.5	-14.9	-21.6	-24.0592	-25.6	-26.1158	-25.5	-2.1	[-2.71:-1.49]
CRG1g	COc1cccc(NC(=O)C=C)c1	178.1	133.977	0.7	1.1	2.2	3.9	4.90667	6.5	9.26833	13.8	-3.1	-7.4	-14	-23.3	-28.8583	-34.6	-40.0667	-44.8	-2.1	[-2.71:-1.49]
CRG2a	CNC(=O)C=C	86.06	110.757	-0.2	-0.1	0.4	1.9	2.33458	3	4.64042	8									0.35	[-0.56:1.23]
CRG2b	C=CC(=O)NCc1ccccc1	162.1	131.796	0.5	1	1.7	3.2	3.76667	4.4	5.48333	7.4	-3.6	-8.3	-14.9	-22.9	-27.6446	-32.9	-38.6054	-44.7	-1.33	[-2.37:-0.29]
CRG2c	OC1CCN(C1)C(=O)C=C	142.1	121.788	0.3	0.7	1.6	3.5	4.61	5.8	7.115	8.6	-4.1	-8.4	-13.8	-21.5	-26.7013	-32.4	-37.9987	-42.9	0.28	[-0.92:0.93]
CRG2d	CC1CCCN1C(=O)C=C	140.1	121.903	0.6	0.9	1.9	4.4	5.53125	6.7	8.26875	10.6	-3.7	-7.7	-13.1	-21.8	-27.2783	-32.9	-38.0217	-42	-0.45	[-1.08:0.18]
CRG3a	CNC(=O)C#CC	98.06	111.852	0	0.4	1.4	3.2	5.83917	8.8	10.6608	10									0.05	[-0.99:1.09]
CRG3b	C/C=C/C(=O)Nc1ccccc1	162.1	131.539	0.7	1	2.2	4	5.80042	8	10.1496	11.8	-4	-9.1	-16.9	-27.3	-33.2808	-39.3	-44.8442	-49.4	-1.88	[-2.15:-1.58]
CRG3e	CNC(=O)\C(C)=C\C	114.1	116.18	0.3	0.7	1.8	3.8	5.40708	7.2	8.84292	10									-0.12	[-0.89:0.65]
CRG3f	CNC(=O)C1=CCCC1	126.1	118.2	0.1	0.7	1.5	3.2	4.46583	6	7.78417	9.8									-0.01	[-0.69:0.67]
CRG3g	CNC(=O)\C=C\C	100.1	113.244	0.1	0.5	1.4	3.4	5.14208	7.1	8.85792	10	-6.6	-14.7	-25	-37.5	-44.8783	-53.1	-62.181	-72.1371	-0.04	[-1.04:0.96]
CRG3i	C=C1CCCNC1=O	112.1	115.564	0.3	0.6	1.5	2.7	4.35083	6.4	8.19917	9.1									0.09	[-0.73:0.91]
CRG4a	CNC(=O)/C=C/COC	130.1	122.232	0.1	0.5	1.5	3.4	4.79417	6.2	7.25583	7.6	-4.4	-10.1	-17.6	-26	-30.8583	-36.1	-41.5417	-47	-0.43	[-1.58:0.72]
CRG4b	CNC(=O)/C=C/OC	116.1	116.071	0.3	0.9	1.7	3.8	5.28833	7.1	9.31167	12	-6.1	-13.5	-22.7	-34.6	-39.3937	-43.7	-48.5312	-54.9	-0.38	[-1.32:0.56]
MQOH	Cc1ccc2ccccc2n1	160.08	125.75	-0.4	-0.6	-0.7	-0.4	0.0554167	0.8	1.89458	3.4	-4.1	-9.4	-16.2	-22.3	-24.7	-26.2	-26	-25	-2.36	[-3.1:-1.62]
3-Hydroxycarbofuran	Cc1ccc2ccccc2n1	238.108	147.55	0.425219	1.11155	2.00282	3.40104	4.52562	6.21037	7.68347	9.94097	-2.61965	-3.99155	-6.95953	-9.9275	-11.5	-14.1954	-13.2222	-8.12631	-2.36	[-3.1:-1.62]
7-aminoclonazepam	Nc1ccc2NC(=O)CN=C(c3ccccc3Cl)c2c1	286.1	162.906	0.43	0.8	1.78	3.06	3.91575	5.04	6.54175	8.53	-1.9	-3.3	-5.7	-8.7	-1.2	-11.8	-13.6	-14.7	-3.86	[-4.38:-3.34]
Acibenzolar-S-methyl	CSC(=O)c1cccc2nnsc12	211	134.84	0.403346	0.791137	1.3001	2.24958	2.99796	3.91065	4.96486	6.3284	-0.886069	-1.70295	-3.21319	-4.72344	-5.54746	-6.40817	-7.62816	-9.19378	-4.44	[-4.51:-4.37]
Aldicarb sulfone	CNC(=O)O\N=C\C(C)(C)[S](C)(=O)=O	223.075	140	-0.234361	0.698967	2.41034	4.13792	5.0818	7.1115	8.87986	10.8259	-1.24767	-1.67253	-0.711263	0.25	1.87544	2.60256	3.94081	6	-1.68	[-1.77:-1.59]
Ametryn	CCNc1nc(NC(C)C)nc(SC)n1	228.13	151.92	0.437807	1.149	2.37527	4.04282	5.06674	6.36824	7.66974	9.28794	-1.32636	-2.4853	-4.77357	-7.06185	-8.1712	-8.75852	-9.34583	-9.1813	-3.05	[-3.11:-2.99]
Aminocarb	CNC(=O)Oc1ccc(N(C)C)c(C)c1	209.129	148.55	0.271162	0.495364	0.788593	1.62259	2.35974	3.21183	4.45885	6.0258	-3.17729	-5.62598	-9.31103	-12.9961	-14.2626	-15.3696	-16.2989	-15.4755	-2.36	[-2.41:-2.31]
Amitraz	CN(C=Nc1ccc(C)cc1C)C=Nc2ccc(C)cc2C	294.201	177.58	0.432646	1.14348	2.3703	4.10437	5.21703	6.66676	8.11649	9.83666	0.260085	0.413677	1.33076	2.24785	3.1258	4.07212	5.37303	7.03455	-5.72	[-5.78:-5.66]
Azoxystrobin	CO\C=C(C(=O)OC)/c1ccccc1Oc2cc(Oc3ccccc3C#N)ncn2	404.125	203.238	0.661558	1.65268	3.13801	5.46455	7.02959	8.77278	10.778	13.0264	0.058276	0.0281064	0.230365	0.432623	0.827363	1.49804	2.16872	3.19208	-4.8	[-4.88:-4.72]
Benalaxyl	COC(=O)C(C)N(C(=O)Cc1ccccc1)c2c(C)cccc2C	326.177	170.293	0.113426	0.694376	1.54396	3.05287	4.28976	6.0511	7.60158	9.40292	-1.97061	-3.50048	-6.16613	-8.83178	-9.83403	-10.6026	-10.6462	-10.3326	-3.99	[-4.03:-3.98]
Benzoximate	CCN(OC(=O)c1ccccc1)C(=O)c2c(OC)ccc(Cl)c2OC	364.075	183.708	0.438256	1.07988	1.87327	3.88808	5.37439	6.19214	7.83091	9.65155	-1.14583	-1.89656	-3.20996	-4.52335	-4.75	-4.32	-3.6	-2.1	-4.66	[-5.03:-4.29]
Bifenazate	COc1ccc(cc1NNC(=O)OC(C)C)c2ccccc2	301.156	175.7	0.276955	0.76658	1.51467	2.72064	3.57938	4.6208	5.66223	7.02078	-1.13889	-1.96928	-4.02952	-6.08977	-7.48113	-8.86655	-10.2964	-12.4054	-5.03	[-5.08:-4.98]
Bitertanol	CC(C)(C)C(O)C(Oc1ccc(cc1)c2ccccc2)n3cncn3	338.187	191.72	-0.0139454	0.799836	2.48032	4.60727	5.7593	7.20897	8.65864	10.4635	-0.50262	-0.936619	-1.61652	-2.29642	-2.67496	-3.1292	-3.67924	-4.40451	-4.89	[-4.94:-4.84]
Boscalid	Clc1ccc(cc1)c2ccccc2NC(=O)c3cccnc3Cl	343.04	175.16	0.414806	0.89416	1.71228	2.95741	3.76443	4.71766	5.88876	7.21198	-1.43201	-2.61401	-3.44228	-4.27054	-5.92708	-6.8164	-7.70573	-8.18902	-4.98	[-6.06:-3.9]
Bupirimate	CCCCc1c(C)nc(NCC)nc1O[S](=O)(=O)N(C)C	317.166	178.73	0.125683	0.872203	2.2203	4.12939	5.34253	6.92345	8.50436	10.3096	-0.953074	-1.83937	-3.65934	-5.47931	-6.57373	-7.45161	-7.98084	-8.23247	-4.21	[-4.25:-4.17]
Buprofezin	CC(C)N1C(=O)N(CSC1=NC(C)(C)C)c2ccccc2	306.169	172.88	0.380436	1.14795	2.31346	4.00938	5.06096	6.17336	7.59212	9.06677	0.494481	0.890116	2.11473	3.33935	4.34096	5.63793	6.9349	8.84109	-5.67	[-5.7:-5.64]
Butafenacil	CN1C(=O)N(C(=O)C=C1C(F)(F)F)c2ccc(Cl)c(c2)C(=O)OC(C)(C)C(=O)OCC=C	475.088	205.65	0.252895	0.937	2.45286	4.57286	5.78213	7.16961	8.71041	10.3693	0.283288	0.342521	0.544891	0.747261	0.98	1.1824	1.25	1.55845	-4.68	[-4.76:-4.6]
Butoxycarboxim	CNC(=O)O\N=C(/C)C(C)[S](C)(=O)=O	223.075	141.54	0.00433072	0.329	1.11648	2.74323	3.83298	4.74393	6.38789	8.32811	-0.623096	-0.607724	-0.0388161	0.530092	1.02187	1.46861	1.15309	0.450581	-0.03	[-0.14:0.08]
Carbendazim	COC(=O)Nc1[nH]c2ccccc2n1	192.077	135.72	0.302401	0.904815	2.0202	3.73557	4.92329	6.5833	8.35956	10.3348	-3.2507	-5.76806	-10.8016	-15.835	-19.5812	-23.3856	-26.9422	-30.0727	-4.1	[-4.1:-4.02]
Carbetamide	CCNC(=O)[C@H](C)OC(=O)Nc1ccccc1	237.124	155.76	0.259299	0.671706	1.40253	2.78769	3.79501	4.92105	6.41571	8.21877	-4.32801	-7.58569	-13.9265	-20.2674	-22.9745	-25.2922	-25.971	-27.2984	-1.84	[-1.88:-1.8]
Carbofuran	CNC(=O)Oc1cccc2CC(C)(C)Oc12	222.113	142.47	0.484967	1.33946	2.78769	4.896	6.21313	7.72207	9.45055	11.3922	-3.64568	-6.41839	-13.2738	-20.1293	-23.9462	-27.8129	-31.026	-33.1209	-2.76	[-2.89:-2.63]
Carboxin	CC1=C(SCCO1)C(=O)Nc2ccccc2	236.075	145.35	0.44927	1.04085	2.17345	3.58726	4.38844	5.51834	6.64824	7.99906	-2.89829	-5.05272	-9.22361	-13.3945	-15.203	-17.0919	-18.0972	-17.8943	-3.16	[-3.26:-3.06]
Carfentrazone-ethyl	CCOC(=O)C(Cl)Cc1cc(N2N=C(C)N(C(F)F)C2=O)c(F)cc1Cl	412.044	177.99	0.27616	0.700139	1.396	2.56293	3.3334	4.00667	4.67994	5.96556	-0.674091	-0.969053	-1.46329	-1.95752	-1.44341	-0.898006	-0.386972	0.5	-4.27	[-4.29:-4.25]
Chlorfluazuron	Fc1cccc(F)c1C(=O)NC(=O)Nc2cc(Cl)c(Oc3ncc(cc3Cl)C(F)(F)F)c(Cl)c2	539.97	221.18	0.253148	0.541827	0.983962	1.98411	2.82647	3.892	5.21857	6.85465	-0.096255	-0.13029	-0.75718	-1.38407	-1.79341	-1.76267	-1.73194	-1.48218	-7.53	[-7.55:-7.51]
Chloroxuron	CN(C)C(=O)Nc1ccc(Oc2ccc(Cl)cc2)cc1	291.091	174.19	0.778797	1.58644	2.86933	4.79597	6.07356	7.61196	9.27163	11.1361	-1.50065	-2.70017	-5.28042	-7.86067	-9.4578	-10.9364	-12.4149	-13.5872	-4.89	[-4.96:-4.82]
Chlortoluron	CN(C)C(=O)Nc1ccc(C)c(Cl)c1	213.08	144.78	0.196371	0.650146	1.38443	2.72559	3.66261	4.64215	6.12774	7.64379	-2.98838	-5.17122	-9.57276	-13.9743	-16.4334	-18.9153	-20.9887	-23.9808	-3.47	[-3.53:-3.41]
Clethodim	CCSC(C)CC1CC(=O)C(C(=O)C1)C(/CC)=N/OC\C=C\Cl	360.141	193.51	-0.166726	-0.172156	0.0458703	0.525968	0.93155	1.62528	2.38435	3.48075	-0.447973	-0.68554	-1.3539	-2.02226	-2.69172	-3.41274	-4.2059	-5.02508	-1.83	[-1.93:-1.82]
Clofentezine	Clc1ccccc1c2nnc(nn2)c3ccccc3Cl	303.02	157.81	0.393795	1.04191	2.05885	3.4998	4.42423	5.63414	7.17022	8.7388	-1.63689	-1.98779	-3.60887	-5.22995	-6.34456	-7.63812	-9.05464	-10.7137	-6.37	[-6.38:-6.25]
Clothianidin	CN=C(NCc1sc(Cl)nc1)N[N+]([O-])=O	250.016	151.57	0.286891	0.65123	1.27086	2.56427	3.54747	4.62315	6.08103	7.67078	-3.44776	-6.01138	-10.2768	-14.5422	-16.8852	-19.4621	-22.1634	-24.8998	-2.98	[-3.53:-2.43]
Cyazofamid	CN(C)[S](=O)(=O)n1c(nc(Cl)c1c2ccc(C)cc2)C#N	325.052	166.91	0.365212	0.81291	1.54977	2.66755	3.40284	4.30372	5.44796	6.82702									-6.44	[-6.45:-6.3]
Cycluron	CN(C)C(=O)NC1CCCCCCC1	199.181	143.91	0.42307	1.00319	2.00476	3.66813	4.82012	6.20667	7.92559	9.86597	-2.40973	-4.20636	-8.46313	-12.7199	-15.6323	-18.4747	-21.0611	-23.2756	-2.25	[-2.34:-2.16]
Cyproconazole	CC(C1CC1)C(O)(Cn2cncn2)c3ccc(Cl)cc3	292.121	166.83	0.435661	1.12213	2.38544	4.45123	5.85657	7.46725	9.12942	11.391	-0.855145	-1.57882	-2.76065	-3.94248	-4.70296	-5.63162	-6.77139	-8.10242	-3.37	[-3.42:-3.36]
Cyprodinil	Cc1cc(nc(Nc2ccccc2)n1)C3CC3	226.139	151.36	0.448912	0.951403	1.92998	3.50228	4.67666	6.42171	7.918	9.7137	-1.27773	-2.35778	-2.6744	-2.99102	-2.42301	-1.56733	-0.377116	1.40918	-4.24	[-4.3:-4.18]
Desmedipham	CCOC(=O)Nc1cccc(OC(=O)Nc2ccccc2)c1	301.119	170.25	0.26585	0.865749	2.04969	3.5642	4.48214	5.86658	7.11319	8.9766									-4.63	[-4.65:-4.61]
Diclobutrazol	CC(C)(C)C(O)C(Cc1ccc(Cl)cc1Cl)n2cncn2	328.099	170.68	0.077959	0.75	1.97015	3.55	4.59969	6.31339	7.63365	9.33995	-0.822958	-1.52535	-2.62591	-3.72647	-4.33295	-5.08712	-6.0203	-7.17936	-4.56	[-4.59:-4.53]
Dicrotophos	CO[P](=O)(OC)OC(/C)=C/C(=O)N(C)C	238.084	149.58	0.402354	0.822101	1.50595	2.48588	3.11249	3.89348	4.7991	5.92393	0.0732171	0.396434	1.90677	3.4171	3.9027	4.83953	6.28973	6.75002	0.62	[0.56:0.63]
Diethofencarb	CCOc1ccc(NC(=O)OC(C)C)cc1OCC	268.155	169.28	-1.0205	-0.403788	1.70157	3.41658	3.81483	5.15527	6.49572	7.99566	-0.451912	-0.746352	-2.2876	-3.82886	-5.07563	-6.36939	-7.10181	-7.26862	-3.99	[-4.06:-3.92]
Difenoconazole	CC1COC(Cn2cncn2)(O1)c3ccc(Oc4ccc(Cl)cc4)cc3Cl	406.073	201.15	-0.000138418	0.25	0.852125	2.12542	2.99397	3.81028	5.50903	7.54865	-0.292658	-0.646627	-1.31798	-1.98933	-2.23771	-2.5343	-2.84935	-3.23946	-4.43	[-4.5:-4.43]
Diflubenzuron	Fc1cccc(F)c1C(=O)NC(=O)Nc2ccc(Cl)cc2	311.04	160.64	0.495989	1.14112	2.19989	3.62223	4.49934	5.6234	6.74747	8.17856									-6.4	[-6.4:-6.3]
Dimethoate	CNC(=O)CS[P](=S)(OC)OC	230.007	140.98	0.479246	1.3177	2.71306	4.7976	6.17799	7.87569	9.57339	11.4937	-3.61558	-6.24265	-11.8904	-17.5382	-21.0937	-24.6424	-27.8985	-30.2424	-0.86	[-0.9:-0.82]
Dimethomorph	COc1ccc(cc1OC)C(=C\C(=O)N2CCOCC2)/c3ccc(Cl)cc3	388.133	193.58	0.375228	0.861546	1.6832	2.93307	3.77526	4.85529	6.05978	7.44107	-0.557919	-1.11374	-2.51654	-3.91933	-4.23545	-4.25561	-4.27577	-3.87772	-4.13	[-4.2:-4.13]
Dimoxystrobin	CNC(=O)C(=N/OC)\c1ccccc1COc2cc(C)ccc2C	327.171	179.21	0.176899	0.72674	1.92572	3.69776	4.95271	6.95841	8.73531	11.03	-1.09926	-1.78602	-2.72637	-3.66673	-3.62299	-3.14982	-2.67664	-1.80059	-4.88	[-4.92:-4.84]
Diniconazole	CC(C)(C)C(O)\C(=C/c1ccc(Cl)cc1Cl)n2cncn2	326.083	171.73	0.206346	0.518022	1.074	2.14439	2.95511	3.96814	5.30497	6.84353	-0.770516	-1.44642	-2.55674	-3.66707	-4.33379	-5.10527	-6.2106	-7.35088	-4.91	[-4.91:-4.87]
Dioxacarb	CNC(=O)Oc1ccccc1C2OCCO2	224.092	141.93	0.504027	0.985074	1.73862	2.93156	3.7147	4.54278	5.56605	6.67657									-1.57	[-1.65:-1.49]
Diuron	CN(C)C(=O)Nc1ccc(Cl)c(Cl)c1	233.025	146.54	0.291391	0.677843	1.30345	2.2104	2.81545	3.62291	4.52826	5.79019	-3.04657	-5.20608	-9.2178	-13.2295	-15.5901	-17.902	-22.5011	-25.0265	-3.76	[-3.83:-3.69]
Epoxiconazole	Fc1ccc(cc1)[C@@]2(Cn3cncn3)O[C@H]2c4ccccc4Cl	330.082	175.2	0.551895	1.01786	1.68315	2.91105	3.77365	4.55335	5.58148	6.73745	-0.943809	-1.72737	-2.89759	-4.06781	-4.72198	-5.47351	-6.43844	-7.59364	-4.85	[-5.65:-4.08]
Etaconazole	CCC1COC(Cn2cncn2)(O1)c3ccc(Cl)cc3Cl	328.062	171.72	0.399822	0.868382	1.60083	2.78885	3.58667	4.48581	5.74	7.0211	-0.836489	-1.5434	-2.61102	-3.67865	-4.32004	-5.02902	-5.98802	-7.17167	-3.61	[-3.61:-3.58]
Ethiprole	CC[S](=O)c1c(N)n(nc1C#N)c2c(Cl)cc(cc2Cl)C(F)(F)F	396.991	180.91	0.267135	0.966155	2.17454	3.66282	4.48357	5.52459	6.56562	7.78757	-1.3381	-2.1762	-4.22173	-6.26726	-7.43811	-8.47828	-9.51844	-10.2584	-4.71	[-5.8:-3.62]
Ethirimol	CCCCC1=C(C)NC(=NC1=O)NCC	210.161	149.92	0.624219	1.0735	1.39232	2.37056	3.34975	4.48435	5.61896	6.442	-3.32927	-6.08293	-11.1057	-16.1284	-18.6341	-20.4613	-22.2885	-22.9846	-2.93	[-4.11:-1.75]
Ethofumesate	CCOC1Oc2ccc(O[S](C)(=O)=O)cc2C1(C)C	287.095	169.63	0.451719	0.987124	1.92418	3.45843	4.4242	5.39734	7.1483	9.40351	-1.06281	-1.906	-2.88183	-3.85766	-4.25088	-4.61868	-5.10103	-5.80087	-3.59	[-3.59:-3.54]
Etoxazole	CCOc1cc(ccc1C2COC(=N2)c3c(F)cccc3F)C(C)(C)C	360.185	185.73	0.56538	1.38348	2.72021	4.81749	6.24317	7.91213	9.58109	11.5586	-0.1029	-0.218019	0.0915089	0.401037	1.07139	2.13847	3.20554	4.80671	-6.69	[-6.74:-6.64]
Famoxadon	CC1(OC(=O)N(Nc2ccccc2)C1=O)c3ccc(Oc4ccccc4)cc3	375.133	196.73	0.591942	1.2481	2.34919	4.06284	5.22157	6.63132	8.04106	9.03186	0.108085	0.0938002	-0.158656	-0.411112	-0.698835	-0.892508	-1.08618	-1.36012	-6.69	[-6.75:-6.63]
Fenamidone	CSC1=N[C@](C)(C(=O)N1Nc2ccccc2)c3ccccc3	312.118	171.35	0.436408	1.03526	2.04036	3.56361	4.57141	5.81575	7.25042	8.83883	-1.43999	-2.61521	-4.55352	-6.49182	-7.14069	-7.56226	-7.6385	-7.42793	-4.6	[-4.63:-4.57]
Fenarimol	OC(c1ccc(Cl)cc1)(c2cncnc2)c3ccccc3Cl	331.041	174.42	0.423976	0.919493	1.68941	2.57769	3.08138	3.83008	4.58804	5.8009	-1.03258	-1.94871	-3.15823	-4.36775	-4.81468	-5.38665	-5.9779	-6.87742	-4.38	[-4.41:-4.35]
Fenazaquin	CC(C)(C)c1ccc(CCOc2ncnc3ccccc23)cc1	307.184	165.29	0.998065	2.24323	4.24478	7.28353	9.24892	11.4278	13.9215	16.6768	-0.0874602	-0.253706	-1.14933	-2.04494	-2.62896	-3.1426	-3.50474	-3.59774	-5.46	[-6.84:-4.08]
Fenbuconazole	Clc1ccc(CCC(Cn2cncn2)(C#N)c3ccccc3)cc1	337.123	178.78	2.6861	3.6953	3.78625	4.71368	5.87168	6.5316	7.19152	8.75697	-0.741393	-1.34958	-2.24116	-3.13274	-3.37875	-3.5931	-3.80325	-3.96482	-5.95	[-5.95:-5.85]
Fenhexamid	CC1(CCCCC1)C(=O)Nc2ccc(O)c(Cl)c2Cl	302.071	160.33	0.595815	1.23154	2.25176	3.78979	4.78931	5.97249	7.46236	9.03804	-2.25888	-3.69229	-6.64081	-9.58933	-11.4732	-13.4222	-15.5911	-17.6896	-4.18	[-4.18:-4.09]
Fenobucarb	CCC(C)c1ccccc1OC(=O)NC	208.134	145.57	0.0887437	0.69574	1.57187	2.85957	3.77991	5.06496	6.35001	8.18033	-3.426	-5.88575	-10.5175	-15.1492	-17.4688	-19.2021	-20.9354	-23.8913	-2.63	[-2.67:-2.59]
Fenoxycarb	CCOC(=O)NCCOc1ccc(Oc2ccccc2)cc1	302.14	179.4	0.174688	0.727056	1.65339	3.06796	3.97564	5.02445	6.44234	7.96551	-2.25143	-3.2754	-6.16302	-9.05063	-10.2607	-11.6455	-12.1772	-13.638	-4.68	[-4.68:-4.63]
Fenpropimorph	CC(CN1CC(C)OC(C)C1)Cc2ccc(cc2)C(C)(C)C	304.264	176	0.620458	1.539	3.08242	5.52467	7.17156	9.04669	10.9218	13.1912	0.788151	1.29654	2.92298	4.54942	5.82771	7.5964	9.36509	11.2	-4.85	[-4.94:-4.76]
Fenpyroximate	Cn1nc(C)c(\C=N\OCc2ccc(cc2)C(=O)OC(C)(C)C)c1Oc3ccccc3	422.209	200.82	0.551774	1.30514	2.53894	4.20841	5.23708	6.53365	7.83021	9.28188	0.323302	0.488428	0.778096	1.06776	1.44584	1.91159	2.37734	3.0274	-7.36	[-7.43:-7.29]
Fenuron	CN(C)C(=O)Nc1ccccc1	165.103	131.6	-0.934674	-0.492294	1.20113	3.60343	4.85277	6.12609	7.39942	8.92509	-4.30682	-7.50586	-14.3219	-21.1378	-24.4634	-27.3379	-29.3354	-30.4059	-1.61	[-1.65:-1.57]
Fipronil	Nc1n(nc(C#N)c1[S](=O)C(F)(F)F)c2c(Cl)cc(cc2Cl)C(F)(F)F	436.946	179.44	-0.934674	-0.492294	1.20113	3.60343	4.85277	6.12609	7.39942	8.92509									-5.21	[-5.28:-5.14]
Flonicamid	FC(F)(F)c1ccncc1C(=O)NCC#N	230.054	146.74	-0.398383	-0.0211639	0.772342	0.717819	0.309974	0.906852	1.50373	2.25164									-1.64	[-1.69:-1.59]
Flufenacet	CC(C)N(C(=O)COc1sc(nn1)C(F)(F)F)c2ccc(F)cc2	364.075	173.62	0.470609	1.28376	2.37188	4.30872	5.67482	6.92988	8.48231	10.4153	-2.20276	-3.95073	-8.32385	-12.697	-14.9071	-16.7811	-18.3321	-19.0697	-3.81	[-3.88:-3.74]
Flufenoxuron	Fc1cc(Oc2ccc(cc2Cl)C(F)(F)F)ccc1NC(=O)NC(=O)c3c(F)cccc3F	489.045	207.59	0.436244	1.07038	2.19154	3.68584	4.61319	5.90759	7.20199	8.79961									-8.22	[-8.22:-8.18]
Fluoxastrobin	CO\N=C(C1=NOCCO1)/c2ccccc2Oc3ncnc(Oc4ccccc4Cl)c3F	459.092	212.64	0.546333	1.22429	2.27468	3.82754	4.8598	6.10415	7.34849	8.8961	0.29167	0.378286	0.688144	0.998001	1.29924	1.98137	2.6635	3.8463	-5.3	[-5.37:-5.23]
Fluquinconazole	Fc1ccc2N=C(n3cncn3)N(C(=O)c2c1)c4ccc(Cl)cc4Cl	376.017	173.6	1.7566	2.35219	2.35804	3.02883	3.85879	4.2535	4.64821	5.78907	0.751323	1.32818	2.39105	3.45391	4.46548	5.32	6.76622	8.2576	-5.54	[-5.58:-5.5]
Flusilazole	C[Si](Cn1cncn1)(c2ccc(F)cc2)c3ccc(F)cc3	316.109	172.74	0.472432	0.990504	1.86376	3.23354	4.15467	5.2408	6.42144	7.85314	-0.730866	-1.33062	-2.09038	-2.85013	-3.12715	-3.46912	-3.92749	-4.37646	-3.83	[-3.92:-3.82]
Flutolanil	CC(C)Oc1cccc(NC(=O)c2ccccc2C(F)(F)F)c1	324.125	169.04	0.503718	1.26166	2.54416	4.49009	5.76008	7.24599	8.89233	10.8203	-1.05747	-1.77263	-3.74125	-5.70987	-7.07856	-8.66323	-10.4224	-12.2809	-4.61	[-4.65:-4.57]
Flutriafol	OC(Cn1cncn1)(c2ccc(F)cc2)c3ccccc3F	302.112	165.52	0.302301	0.664501	1.25482	2.2746	3.00374	3.86086	4.91851	6.34122	-1.21573	-2.21857	-3.74192	-5.26527	-6.30868	-7.61058	-9.06573	-10.7738	-3.4	[-3.45:-3.4]
Forchlorfenuron	Clc1cc(NC(=O)Nc2ccccc2)ccn1	248.059	153.43	0.340788	0.701647	1.31994	2.41569	3.20866	4.16644	5.36184	6.82539	-1.89436	-3.43699	-6.94484	-10.4527	-12.9408	-15.5416	-17.9694	-20.1116	-3.8	[-3.86:-3.74]
Fuberidazole	[nH]1c2ccccc2nc1c3occc3	185.071	132.88	0.285971	0.25	-0.0233082	0.3152	0.985826	1.90127	3.12228	4.75526	-5.24843	-9.41591	-17.2102	-25.0044	-28.5403	-32.1213	-35.3318	-36.285	-3.41	[-3.41:-3.33]
Furalaxyl	COC(=O)C(C)N(C(=O)c1occc1)c2c(C)cccc2C	302.143	163.24	0.574893	1.36582	2.6737	4.8367	6.32311	8.01326	9.99799	12.2271	-3.01568	-5.22498	-8.00407	-10.7832	-11.3045	-12.2164	-11.2932	-10.5998	-3.13	[-3.26:-3.12]
Furathiocarb	CCCCOC(=O)N(C)SN(C)C(=O)Oc1cccc2CC(C)(C)Oc12	383.169	192.59	0.582164	1.50767	2.93108	5.07386	6.46958	8.0415	9.86475	11.8803	-0.42719	-0.690587	-0.0952936	0.5	1.75	2.75	4.64794	6.56083	-4.55	[-4.61:-4.49]
Hexaconazole	CCCCC(O)(Cn1cncn1)c2ccc(Cl)cc2Cl	314.083	171.85	0.378143	0.83062	1.59022	2.78489	3.58977	4.55144	5.66024	6.9961	-0.840469	-1.55195	-2.66278	-3.7736	-4.35154	-5.09618	-6.03769	-7.10011	-4.25	[-4.29:-4.21]
Hexaflumuron	FC(F)C(F)(F)Oc1c(Cl)cc(NC(=O)NC(=O)c2c(F)cccc2F)cc1Cl	460.989	193.9	-0.15588	0.525392	1.99094	3.67951	4.53548	5.82873	7.12198	8.66211									-7.23	[-7.27:-7.19]
Hexythiazox	C[C@H]1C(SC(=O)N1C(=O)NC2CCCCC2)c3ccc(Cl)cc3	353.112	180.03	0.295711	0.954463	2.11728	3.79131	4.81952	6.01098	7.40244	8.92661									-6.08	[-6.08:-6.03]
Hydramethylnon	CC1(C)CNC(=NC1)N\N=C(/C=C/c2ccc(cc2)C(F)(F)F)\C=C\c3ccc(cc3)C(F)(F)F	495.199	235.73	0.432606	0.941918	1.76563	3.02363	3.84055	4.75586	5.83331	7.06381	0.449156	0.660233	1.25667	1.8531	2.29591	1.40958	1.74345	2.276	-7.49	[-7.88:-7.1]
Imidacloprid	[O-][N+](=O)NC1=NCCN1Cc2ccc(Cl)nc2	256.061	150.1	0.46308	0.831229	1.05568	1.4822	1.97847	2.8255	3.54095	4.78032	-1.86643	-3.39171	-5.31984	-7.24798	-7.95271	-8.68063	-9.4892	-10.4295	-2.83	[-4.56:-1.1]
Indoxacarb	COC(=O)N(C(=O)N1CO[C@]2(Cc3cc(Cl)ccc3C2=N1)C(=O)OC)c4ccc(OC(F)(F)F)cc4	528.078	210.52	0.602985	1.33384	2.5426	4.46607	5.70961	6.96477	8.48577	10.3169	-1.61575	-2.91513	-5.41958	-7.92404	-8.5395	-9.13252	-8.7243	-7.94627	-6.42	[-6.42:-6.33]
Ipconazole	CC(C)C1CCC(C1(CN2C=NC=N2)O)CC3=CC=C(C=C3)Cl	334.169	167.66	0.599717	1.38085	2.72491	4.75391	6.07648	7.67505	9.5121	11.5969	0.247934	0.421459	0.508891	0.596324	0.54018	0.304272	-0.0844688	-0.549798	-4.68	[-4.68:-4.6]
Iprovalicarb	CC(C)OC(=O)N[C@H](C(C)C)C(=O)NC(C)c1ccc(C)cc1	321.218	184.97	0.501015	1.29515	2.57138	4.45775	5.70983	7.27718	8.93044	10.785	-0.877053	-1.4871	-1.97696	-2.46681	-2.44677	-1.75	-0.945532	0.75	-4.26	[-4.32:-4.2]
Isoprocarb	CNC(=O)Oc1ccccc1C(C)C	194.118	140.4	-0.102782	0.186558	1.15727	2.31909	2.84908	3.74405	5.42567	7.51074	-4.04648	-6.83834	-10.0289	-13.2194	-13.0724	-13.3914	-12.4108	-11.2942	-2.77	[-2.82:-2.72]
Isoproturon	CC(C)c1ccc(NC(=O)N(C)C)cc1	207.15	150.35	0.223115	0.58044	1.22785	2.39036	3.24892	4.38667	5.91415	7.59722	-2.15925	-3.79867	-7.19158	-10.5845	-12.369	-13.8779	-15.0249	-15.5456	-3.5	[-3.55:-3.45]
Kresoxim-methyl	CO\N=C(C(=O)OC)/c1ccccc1COc2ccccc2C	314.139	175.13	-0.635902	0.111767	2.30195	4.92196	6.14903	7.7445	9.33996	11.56	-3.02242	-4.79478	-8.59536	-12.3959	-13.9786	-14.6943	-13.6621	-9.72376	-5.19	[-5.27:-5.11]
Linuron	CON(C)C(=O)Nc1ccc(Cl)c(Cl)c1	249.02	148.44	0.161615	0.48723	0.941953	2.16277	3.21765	4.29513	5.37262	6.98571									-3.54	[-3.6:-3.48]
Lufenuron	FC(C(F)(F)F)C(F)(F)Oc1cc(Cl)c(NC(=O)NC(=O)c2c(F)cccc2F)cc1Cl	510.986	193.43	-0.382752	0.323424	1.9994	3.79383	4.6099	5.98196	7.35401	8.86683									-6.99	[-7.02:-6.99]
Mandipropamid	COC1=C(C=CC(=C1)CCNC(=O)C(C2=CC=C(C=C2)Cl)OCC#C)OCC#C	412.136	196.28	0.694216	1.60011	2.98544	5.13757	6.61556	8.36352	10.1115	12.1853	0.0969971	0.0941673	-0.413828	-0.921824	-1.36292	-2.01913	-2.67534	-3.43591	-4.99	[-5.03:-4.95]
Mefenacet	CN(C(=O)COc1sc2ccccc2n1)c3ccccc3	299.087	166.42	0.368501	1.05871	2.14997	3.96135	5.19548	6.51612	8.12331	10.0104	-0.397421	-0.675809	-0.0727967	0.530216	1.38989	2.41196	3.85577	5.60055	-4.87	[-4.89:-4.85]
Mepanipyrim	CC#Cc1cc(C)nc(Nc2ccccc2)n1	224.123	150.85	0.388216	0.9215	1.91269	3.65191	4.8997	6.41482	8.15115	10.2387	-1.56196	-2.81918	-3.34284	-3.86651	-3.39659	-3.0706	-2.13515	-0.473922	-4.94	[-4.94:-4.87]
Mepronil	CC(C)Oc1cccc(NC(=O)c2ccccc2C)c1	270.151	167.68	0.415026	1.08926	2.21666	3.85966	4.94165	6.34325	7.83618	9.58273	-1.75279	-3.03411	-5.77947	-8.52483	-10.45	-12.6287	-14.916	-17.1979	-4.33	[-4.39:-4.27]
Mesotrione	C[S](=O)(=O)c1ccc(C(=O)C2C(=O)CCCC2=O)c(c1)[N+]([O-])=O	340.049	176.08	0.460156	0.87958	1.38167	2.5364	3.39145	3.92996	4.78773	6.03644									-3.04	[-4.26:-1.74]
Metaflumizone	C1=CC(=CC(=C1)C(F)(F)F)/C(=N/NC(=O)NC2=CC=C(C=C2)OC(F)(F)F)/CC3=CC=C(C=C3)C#N	507.126	213.05	0.564782	1.19323	2.27252	3.76231	4.69999	5.91996	7.13993	8.73991									-7.17	[-7.91:-6.43]
Metalaxyl	COCC(=O)N(C(C)C(=O)OC)c1c(C)cccc1C	280.157	155.72	0.429395	1.15242	2.42997	4.30525	5.5335	7.14643	8.92453	10.9428	-3.39726	-5.82267	-7.95754	-10.0924	-9.98123	-10.4662	-9.25	-7.87029	-1.36	[-1.46:-1.35]
Metconazole	CC1(C)CCC(Cc2ccc(Cl)cc2)C1(O)Cn3cncn3	320.153	172.14	0.519559	1.37056	3.04562	5.39229	6.78352	8.4579	10.3931	12.6765	0.172335	0.286161	0.492762	0.699363	0.628999	0.312706	-0.125464	-0.680722	-4.17	[-4.2:-4.14]
Methabenzthiazuron	CNC(=O)N(C)c1sc2ccccc2n1	222.07	139.7	0.332111	0.659871	1.15001	2.2484	3.1655	4.30581	5.73161	7.37807	-2.18828	-3.8828	-6.79869	-9.71458	-10.6524	-11.2486	-11.3547	-11.0264	-3.57	[-3.65:-3.49]
Methamidophos	CO[P](N)(=O)SC	142.009	116.66	-0.926209	-2.09803	-3.66564	-5.04895	-5.47193	-5.63011	-5.2787	-4.53126	-6.76275	-11.7837	-20.9726	-30.1615	-35.2295	-41.1325	-46.786	-52.4396	0.62	[0.53:0.65]
Methiocarb	CNC(=O)Oc1cc(C)c(SC)c(C)c1	226.108	149.45	-0.15012	0.218755	1.10837	2.02111	2.34634	2.88268	4.09263	5.96577	-2.1505	-3.51493	-6.72322	-9.93151	-11.8065	-13.9151	-16.2069	-18.7084	-3.99	[-4.03:-3.95]
Methoprotryne	COCCCNc1nc(NC(C)C)nc(SC)n1	272.154	159.68	0.566086	1.28107	2.5161	4.40954	5.65659	7.14525	8.8151	10.8123	-0.279219	-0.535678	-2.22898	-3.92228	-4.36654	-5.22754	-5.17699	-4.7946	-2.93	[-2.98:-2.93]
Methoxyfenozide	COc1cccc(C(=O)NN(C(=O)c2cc(C)cc(C)c2)C(C)(C)C)c1C	369.218	193.1	0.491422	1.16914	2.33061	4.16486	5.40415	6.82403	8.17617	9.94927	-0.792838	-1.30999	-1.95159	-2.59318	-2.7215	-2.97198	-3.22513	-3.41797	-5.31	[-5.37:-5.25]
Metribuzin	CSC1=NN=C(C(=O)N1N)C(C)(C)C	215.097	139.56	0.36573	0.680098	1.01383	1.84374	2.59799	3.54466	4.74249	6.12841	-2.50229	-4.51906	-8.32427	-12.1295	-14.0678	-15.7813	-17.0025	-17.7622	-2.28	[-2.32:-2.24]
Mevinphos	COC(=O)\C=C(/C)O[P](=O)(OC)OC	225.053	136.59	0.147388	0.838092	2.1348	3.42119	4.50287	7.66033	9.71155	12.2792	-4.72732	-8.40049	-14.1212	-19.8419	-21.4967	-22.5559	-22.2312	-20.9663	0.5	[0.47:0.53]
Mexacarbate	CNC(=O)Oc1cc(C)c(N(C)C)c(C)c1	223.147	152.28	0.322787	0.700021	1.37045	2.60913	3.49762	4.51217	5.93183	7.71386	-2.28602	-3.99424	-5.26443	-6.53463	-6.27881	-6.68277	-5.69185	-4.41896	-3.35	[-3.35:-3.29]
Monocrotophos	CNC(=O)\C=C(/C)O[P](=O)(OC)OC	224.069	139.4	-0.00141549	0.410976	1.29998	2.52441	3.20241	4.02869	5.41002	7.38262	-1.93347	-3.2073	-7.60289	-11.9985	-15.6646	-19.7961	-24.3976	-28.9785	0.62	[0.56:0.63]
Monolinuron	CON(C)C(=O)Nc1ccc(Cl)cc1	215.059	142.02	0.0050512	0.139117	0.476259	1.32006	2.05131	3.06954	4.36076	5.94195	-4.10443	-6.70886	-11.4778	-16.2467	-19.2871	-22.5153	-25.425	-28.2322	-2.47	[-2.51:-2.43]
Myclobutanil	CCCCC(Cn1cncn1)(C#N)c2ccc(Cl)cc2	289.123	176.14	0.325025	0.72691	1.38538	2.4268	3.11217	3.86829	4.83622	6.05209	-1.33074	-2.39474	-3.87875	-5.36275	-5.98579	-6.53275	-7.04976	-7.7311	-3.32	[-3.42:-3.22]
Neburon	CCCCN(C)C(=O)Nc1ccc(Cl)c(Cl)c1	275.074	162.73	0.210741	0.987106	2.45027	3.58112	3.97914	5.30159	6.62404	8.23543	-1.96093	-3.4218	-6.23012	-9.03843	-10.8788	-12.6311	-14.3835	-15.9478	-4.75	[-4.76:-4.61]
Nitenpyram	CCN(Cc1ccc(Cl)nc1)\C(NC)=C\[N+]([O-])=O	271.097	157.38	0.191349	0.511206	1.0566	1.78053	2.3267	3.3849	4.40197	5.81266	-2.37087	-4.35436	-7.68281	-11.0113	-13.6239	-15.9585	-18.1103	-19.829	0.41	[0.24:0.49]
Novaluron	FC(OC(F)(F)F)C(F)(F)Oc1ccc(NC(=O)NC(=O)c2c(F)cccc2F)cc1Cl	493.021	203.19	-0.358306	0.278459	1.82478	3.61176	4.48293	5.77548	7.06803	8.5918									-7.39	[-7.39:-7.38]
Nuarimol	OC(c1ccc(F)cc1)(c2cncnc2)c3ccccc3Cl	315.07	168.9	0.458027	0.850128	1.41353	2.50823	3.24209	3.75775	4.77667	6.02419	-1.14775	-2.13762	-3.47282	-4.80802	-5.44663	-6.12255	-6.99442	-8.09995	-4.08	[-4.1:-4.06]
Oxadixyl	COCC(=O)N(N1CCOC1=O)c2c(C)cccc2C	279.135	155.64	0.1124	0.25	1.36805	3.10956	4.13952	5.55607	7.15822	9.11525	-0.831041	-1.11044	-3.01642	-4.9224	-7.56319	-11.1482	-16.1661	-22.25	-1.91	[-1.97:-1.85]
Penconazole	CCCC(Cn1cncn1)c2ccc(Cl)cc2Cl	284.073	161.75	0.480284	0.975947	1.72324	3.06849	4.00045	4.913	6.25885	7.77713	-1.09532	-1.98428	-2.92661	-3.86894	-4.21845	-4.66389	-5.20704	-5.83441	-3.59	[-3.59:-3.56]
Pencycuron	Clc1ccc(CN(C2CCCC2)C(=O)Nc3ccccc3)cc1	329.148	179.27	0.487905	1.19555	2.34939	3.94475	4.96341	6.29253	7.62165	9.24786	-0.850882	-1.62501	-3.70405	-5.7831	-6.87262	-7.73496	-8.59729	-9.00686	-6.04	[-6.04:-5.98]
Phenmedipham	COC(=O)Nc1cccc(OC(=O)Nc2cccc(C)c2)c1	301.119	170.59	0.486583	1.33904	2.47099	4.31612	5.59706	6.85666	8.11625	9.8721	-1.30981	-2.15022	-4.23976	-6.32929	-7.77512	-9.36795	-10.9608	-12.2831	-4.9	[-4.92:-4.88]
Picoxystrobin	CO/C=C(C(=O)OC)/c1ccccc1COc2cccc(n2)C(F)(F)F	368.111	175.01	0.44418	1.25	2.55009	4.56104	5.8987	7.3957	8.8927	10.739	0.370922	0.821016	2.14714	3.47327	4.49925	5.95372	7.40819	9.45255	-5.07	[-5.1:-5.04]
Pirimicarb	CN(C)C(=O)Oc1nc(nc(C)c1C)N(C)C	239.151	146.02	0.333057	0.802886	1.66921	3.11123	4.13474	5.4541	6.94209	8.78669	0.00141086	-0.00706259	1.17259	2.35223	3.41325	4.6636	6.32336	8.17291	-1.93	[-1.97:-1.89]
Prochloraz	CCCN(CCOc1c(Cl)cc(Cl)cc1Cl)C(=O)n2ccnc2	376.039	180.02	0.48177	1.00361	1.70027	3.17073	4.25812	5.21574	6.72469	8.08814	-0.289045	-0.46467	-1.22623	-1.98779	-2.58403	-3.34995	-4.09981	-4.91305	-4.08	[-4.15:-4.01]
Promecarb	CNC(=O)Oc1cc(C)cc(c1)C(C)C	208.133	148.8	0.344868	0.80555	1.4262	2.57365	3.42255	4.43221	6.19538	8.42034	-2.9334	-5.02909	-8.42409	-11.8191	-13.5	-15.547	-17.5417	-19.6326	-3.35	[-3.36:-3.32]
Prometon	COc1nc(NC(C)C)nc(NC(C)C)n1	226.167	152.45	0.542786	1.24065	2.41296	4.22769	5.453	6.95176	8.57465	10.5648	-1.34584	-2.51834	-4.75446	-6.99059	-7.83526	-8.41754	-8.4042	-8.04896	-2.52	[-2.61:-2.43]
Prometryne	CSc1nc(NC(C)C)nc(NC(C)C)n1	242.15	157.19	0.496003	1.25537	2.52087	4.30408	5.44474	6.89507	8.34541	10.1063	-0.97512	-1.86571	-3.59247	-5.31924	-6.10298	-6.42285	-6.74271	-6.50646	-3.96	[-4:-3.92]
Propamocarb	CCCOC(=O)NCCCN(C)C	189.16	143.16	0.204537	0.728977	1.80841	3.63996	4.94836	6.66249	8.49967	10.6444	-0.0993614	-0.158709	0.679235	1.51718	2.47113	3.77914	5.39077	7.23594	0.66	[0.59:0.68]
Propiconazole	CCCC1COC(Cn2cncn2)(O1)c3ccc(Cl)cc3Cl	342.078	180.29	0.439552	0.89265	1.62934	2.84665	3.68523	4.64097	5.77781	7.12787	-0.768577	-1.40487	-2.24026	-3.07566	-3.55217	-4.07946	-4.75366	-5.52614	-3.45	[-3.53:-3.37]
Propoxur	CNC(=O)Oc1ccccc1OC(C)C	210.112	140.64	0.667376	0.782655	0.844937	1.90436	3.00971	4.00501	5.436	7.35198	-2.98128	-5.91401	-10.5546	-15.1952	-17.2024	-19.6473	-20.8242	-21.1069	-2.05	[-2.1:-2.05]
Prothioconazole	OC(CN1NC=NC1=S)(Cc2ccccc2Cl)C3(Cl)CC3	344.04	165.83	0.3918	0.925167	1.82887	3.31819	4.35507	5.55875	6.76243	8.12039	-0.794077	-1.37664	-2.2776	-3.17857	-3.7563	-4.46136	-5.16643	-5.87268	-3.9	[-4.84:-3.06]
Pymetrozine	CC1=NNC(=O)N(C1)\N=C\c2cccnc2	218.105	149.28	0.000518624	-0.126575	-0.202519	0.09037	0.47075	1.00437	1.79897	2.79364	-1.88671	-3.40289	-6.28943	-9.17597	-11.3601	-14.0623	-16.9591	-19.9836	-2.88	[-2.96:-2.8]
Pyracarbolid	CC1=C(CCCO1)C(=O)Nc2ccccc2	218.118	144.13	0.262933	0.650078	1.42483	2.82505	3.83547	5.08004	6.61456	8.5011	-3.18961	-5.56048	-9.07436	-12.5882	-13.5154	-14.4502	-14.5306	-14.0057	-2.56	[-2.58:-2.54]
Pyraclostrobin	CON(C(=O)OC)c1ccccc1COc2ccn(n2)c3ccc(Cl)cc3	388.108	186.27	0.298747	0.984413	2.16433	4.02666	5.28876	6.78002	8.27128	10.0633	0.419957	0.759942	1.88971	3.01949	4.0636	5.316	6.56839	8.54104	-5.31	[-5.35:-5.27]
Pyridaben	CC(C)(C)N1N=CC(=C(Cl)C1=O)SCc2ccc(cc2)C(C)(C)C	365.149	191.33	0.202099	1	2.42285	4.35604	5.54066	7.07856	8.61646	10.4152	-1.39726	-2.37514	-4.56302	-6.75091	-7.98113	-8.94328	-9.90542	-10.5	-7.35	[-7.4:-7.3]
Pyrimethanil	Cc1cc(C)nc(Nc2ccccc2)n1	200.121	142.27	0.302218	0.811267	1.74318	3.39393	4.59483	6.09545	7.89263	10.0626	-2.29312	-4.15252	-5.11402	-6.07552	-5.6862	-4.94238	-3.56441	-1.77867	-3.22	[-3.33:-3.11]
Pyriproxyfen	CC(COc1ccc(Oc2ccccc2)cc1)Oc3ccccn3	322.15	186.24	0.153355	0.719852	1.73363	3.09116	3.92677	5.05292	6.17907	7.86948	-0.440991	-0.784385	-0.849304	-0.914223	-0.453233	0.227947	0.909126	2.08613	-5.94	[-5.99:-5.89]
Quinoxyfen	Fc1ccc(Oc2ccnc3cc(Cl)cc(Cl)c23)cc1	308.007	160.78	0.44461	0.900046	1.6617	2.92582	3.76938	4.65335	5.78863	7.15257	-1.16788	-2.31056	-4.93312	-7.55568	-9.55092	-11.7357	-14.0005	-16.0466	-6.62	[-6.72:-6.52]
Rotenone	COc1cc2OC[C@H]3Oc4c5C[C@@H](Oc5ccc4C(=O)[C@H]3c2cc1OC)C(C)=C	395.152	197.34	0.578951	1.09735	1.994	3.62355	4.79683	6.10085	7.54559	8.98392	-1.08947	-2.20666	-5.67527	-9.14387	-12.3382	-14.4466	-16.5	-19.1139	-4.89	[-4.94:-4.84]
Secbumeton	CCNc1nc(NC(C)CC)nc(OC)n1	226.167	153.44	0.51779	1.18937	2.38667	4.1882	5.37495	6.86477	8.47626	10.4979	-1.38636	-2.59658	-5.1775	-7.75842	-8.79082	-9.90664	-10.3656	-10.1661	-2.58	[-2.68:-2.48]
Simetryn	CCNc1nc(NCC)nc(SC)n1	214.114	144.87	0.333643	0.724724	1.41758	2.72125	3.68716	4.84412	6.33449	8.11275	-1.77107	-3.25939	-6.18652	-9.11364	-10.5488	-11.621	-12.2123	-12.1637	-2.68	[-2.74:-2.62]
Spirodiclofen	CCC(C)(C)C(=O)OC1=C(C(=O)OC12CCCCC2)c3ccc(Cl)cc3Cl	411.113	190.31	0.346467	1.08698	2.40645	4.14694	5.18606	6.55578	7.95586	9.54252	-1.45413	-2.15826	-4.79932	-7.44037	-9.04001	-10.75	-12.4168	-13.8733	-6.91	[-6.92:-6.79]
Spirotetramat	CCOC(=O)OC1=C(C(=O)NC12CCC(CC2)OC)C3=C(C=CC(=C3)C)C	374.2	193.47	0.547307	1.24993	2.33405	4.04397	5.23883	6.68296	8.12708	9.95845	0.0715054	0.0348919	-0.1596	-0.354093	-0.602967	-0.895833	-1.1887	-1.44361	-3.65	[-4.68:-2.55]
Spiroxamine	CCCN(CC)CC1COC2(CCC(CC2)C(C)(C)C)O1	298.279	178.24	0.593763	1.28371	2.4144	4.24452	5.46742	6.79618	8.39566	10.2328	0.027247	-0.0737335	0.520094	1.11392	1.96479	2.93146	4.28905	5.89156	-2.84	[-2.91:-2.77]
Sulfentrazone	CC1=NN(C(=O)N1C(F)F)c2cc(N[S](C)(=O)=O)c(Cl)cc2Cl	386.99	172.57	0.335888	1.14619	2.63807	4.59718	5.81998	7.61102	9.26951	11.5156									-2.7	[-2.74:-2.7]
Tebuconazole	CC(C)(C)C(O)(CCc1ccc(Cl)cc1)Cn2cncn2	308.153	160.62	0.741363	1.77236	3.62749	6.45132	8.24591	10.2809	12.693	15.3997	0.387374	0.684045	1.2551	1.82616	2.09203	2.26343	2.20562	2.13735	-3.93	[-3.96:-3.9]
Tebufenpyrad	CCc1nn(C)c(C(=O)NCc2ccc(cc2)C(C)(C)C)c1Cl	334.174	183.25	0.50248	1.14799	2.23016	3.84104	4.81672	5.68013	6.54355	8.22838	-0.792336	-1.5	-2.54969	-3.59938	-4.1883	-4.91469	-5.64107	-6.49116	-5.12	[-5.16:-5.08]
Tebuthiuron	CNC(=O)N(C)c1sc(nn1)C(C)(C)C	229.113	142.99	2.45768	3.47138	3.54735	4.63605	5.97925	6.77247	7.56568	9.51234	-2.33714	-4.18104	-7.70849	-11.2359	-12.787	-13.9335	-14.5407	-14.5134	-1.97	[-2:-1.94]
Teflubenzuron	Fc1cccc(F)c1C(=O)NC(=O)Nc2cc(Cl)c(F)c(Cl)c2F	380.982	169.28	-1.16168	-0.652523	1.23661	3.33998	4.20402	5.49917	6.79432	8.37842	0.0657813	-0.155085	-0.882732	-1.61038	-2.16088	-2.58564	-3.0104	-3.07368	-7.43	[-7.44:-7.35]
Temephos	CO[P](=S)(OC)Oc1ccc(Sc2ccc(O[P](=S)(OC)OC)cc2)cc1	467.001	216.23	1.16024	2.16239	3.2222	5.67204	7.69349	9.49658	11.2997	13.8676									-7.05	[-7.05:-6.97]
Terbumeton	CCNc1nc(NC(C)(C)C)nc(OC)n1	226.167	150	0.463327	1.23516	2.54639	4.37883	5.55096	7.08994	8.62892	10.4847	-1.3717	-2.56234	-5.15982	-7.7573	-8.78044	-9.58814	-10.3958	-10.288	-3.21	[-3.24:-3.07]
Terbutryne	CCNc1nc(NC(C)(C)C)nc(SC)n1	242.15	154.61	0.494845	1.25353	2.52794	4.32806	5.48038	6.94747	8.41455	10.1781	-1.00215	-1.89693	-3.64121	-5.38548	-6.18636	-6.57058	-6.9548	-6.69638	-3.99	[-4.03:-3.95]
Tetraconazole	FC(F)C(F)(F)OCC(Cn1cncn1)c2ccc(Cl)cc2Cl	372.029	170.4	0.491528	1.10085	2.13106	3.69799	4.7256	5.93681	7.27671	8.91518	-0.737321	-1.29073	-2.01417	-2.73762	-2.90639	-3.12638	-3.37136	-3.71391	-3.38	[-3.4:-3.36]
Thiabendazole	[nH]1c2ccccc2nc1c3cscn3	202.044	135.57	0.0619067	-0.041994	-0.00119792	0.598668	1.22855	2.06583	3.27581	4.85811	-4.36966	-7.94569	-14.7259	-21.5062	-24.9401	-28.1967	-30.3757	-31.6765	-3.6	[-3.6:-3.5]
Thiacloprid	Clc1ccc(CN2CCSC2=NC#N)cn1	253.032	158.92	0.17896	0.226161	0.230517	0.44257	0.741672	1.26962	1.97983	2.90317	-1.91487	-3.50487	-8.23322	-12.9616	-16.5583	-20.6003	-25.1936	-30.1859	-3.14	[-3.2:-3.08]
Thiamethoxam	CN1COCN(Cc2sc(Cl)nc2)\C1=N/[N+]([O-])=O	292.027	157.1	0.496395	0.894817	1.23593	2.2398	3.0992	3.82283	5.11794	6.53722	-0.999007	-1.81792	-3.26995	-4.72198	-5.59649	-6.63023	-7.76344	-9.1681	-1.86	[-1.98:-1.85]
Thidiazuron	O=C(Nc1snnc1)Nc2ccccc2	221.05	147.29	0.444002	1.13052	2.43375	4.49306	5.80457	7.14011	8.47565	10.0582	-2.68981	-4.85184	-9.11896	-13.3861	-16.3267	-19.5882	-22.8497	-26.1027	-4.04	[-4.04:-3.99]
Thiobencarb	CCN(CC)C(=O)SCc1ccc(Cl)cc1	258.072	155.12	0.165018	0.750909	1.80731	3.41874	4.50746	5.96619	7.63204	9.4431									-4.04	[-4.09:-3.99]
Thiophanate-methyl	COC(=O)NC(=S)Nc1ccccc1NC(=S)NC(=O)OC	343.054	173	0.58257	1.21222	2.25307	3.77807	4.80232	6.1773	7.62819	9.25696	-0.809453	-1.53541	-2.60475	-3.67409	-4	-3.64536	-2.99378	-2.0856	-3.74	[-3.77:-3.71]
Triadimefon	CC(C)(C)C(=O)C(Oc1ccc(Cl)cc1)n2cncn2	294.104	172.41	0.444414	0.834288	1.17126	2.31448	3.36231	4.23515	5.10799	6.54679	-1.04679	-1.8547	-3.06349	-4.27228	-4.86005	-5.70137	-6.54269	-7.77067	-3.61	[-3.61:-3.57]
Triadimenol	CC(C)(C)C(O)C(Oc1ccc(Cl)cc1)n2cncn2	296.135	171.43	0.28985	0.79965	1.55527	2.86629	3.75658	4.64911	6.05516	7.4846	-0.923659	-1.67592	-2.79642	-3.91693	-4.63318	-5.54263	-6.67366	-8.06957	-3.5	[-3.55:-3.45]
Tricyclazole	Cc1cccc2sc3nncn3c12	190.044	130.04	0.200061	0.21258	0.0822465	0.528745	1.15484	1.86496	2.91389	4.21789	-2.08206	-3.56106	-7.3927	-11.2243	-14.4753	-17.9946	-21.7202	-24.7904	-3.74	[-4.61:-2.87]
Trifloxystrobin	CO\N=C(C(=O)OC)/c1ccccc1CO\N=C(/C)c2cccc(c2)C(F)(F)F	409.146	190.48	0.410442	1.27574	2.68553	4.90927	6.42392	8.18716	9.95039	11.9288	0.66862	1.2353	2.83173	4.42815	5.50977	7.0902	8.67062	10.35	-5.83	[-5.86:-5.8]
Triflumizole	CCCOCC(=Nc1ccc(Cl)cc1C(F)(F)F)n2ccnc2	346.092	173.15	0.390657	0.865042	1.61511	3.13608	4.23449	5.23462	6.63045	8.05439	-0.650239	-1.10907	-2.24089	-3.37271	-4.36463	-5.60114	-6.99801	-8.47022	-2.98	[-3.03:-2.98]
Triflumuron	FC(F)(F)Oc1ccc(NC(=O)NC(=O)c2ccccc2Cl)cc1	359.041	165.83	-0.713522	-0.155636	1.55561	3.73875	4.85333	6.32427	7.79521	9.48466									-7.05	[-7.05:-6.93]
Triticonazole	CC1(C)CC\C(=C/c2ccc(Cl)cc2)C1(O)Cn3cncn3	318.138	175.74	0.438672	0.920719	1.66174	2.86543	3.64387	4.42061	5.65332	7.00145	-0.57457	-1.09984	-1.87608	-2.65231	-3.03275	-3.42281	-3.98341	-4.74351	-3.99	[-4.4:-3.58]
Zoxamide	CCC(C)(NC(=O)c1cc(Cl)c(C)c(Cl)c1)C(=O)CCl	336.033	167.43	0.59695	1.32253	2.45405	4.24331	5.41389	6.63208	8.14286	9.80916	-1.37571	-2.38695	-4.30412	-6.22129	-7.14002	-8.00498	-8.5768	-8.90462	-5.69	[-5.78:-5.6]
(+)-Methadone	CCC(=O)C(CC(C)N(C)C)(c1ccccc1)c2ccccc2	310.2	176.858	0.537502	1.27202	2.47934	4.2949	5.48912	6.8975	8.5942	10.3097	1.45	2	3.1	5	6.1	7.4	8.9	10.6	-4.61	[-5.96:-3.26]
(+-)-Propanolol	CC(C)NCC(COC1=CC=CC2=CC=CC=C21)O	260	162.498	0.417446	0.976089	1.95677	3.53634	4.6342	5.98621	7.65366	9.55925	-1.15	-2.5	-4.1	-4.6	-4.6	-3.4	-1.8	-0.2	-3.23	[-3.29:-3.17]
(+)-Propoxyphene	CCC(=O)O[C@@](Cc1ccccc1)([C@H](C)CN(C)C)c2ccccc2	340.1	182.509	0.607709	1.32627	2.56568	4.43218	5.62601	7.10292	8.85859	10.7438	1.25	1.6	2.5	4.3	5.5	6.9	8.3	10	-4.99	[-5.07:-4.91]
2,3-Methylenedioxyamphetamine (MDA)	CC(N)Cc1cccc2OCOc12	180.1	138.563	-0.186677	-0.471928	-0.703666	-0.625921	-0.34373	0.135508	0.826672	1.8288	-2.7	-5.3	-10.1	-16	-19.3	-22.8	-26.3	-29.3	-1.89	[-2.97:-0.92]
4-Aminobutyric acid (GABA)	NCCCC(O)=O	104.1	118.267	-1.54441	-3.1	-5	-6.9	-7.5	-7.9	-7.8	-7.2	-7.4	-13.4	-24.3	-37.2	-43.5	-50.1	-55.8	-61.1	1.1	[1.08:1.1]
4-Fluoroamphetamine	CC(N)Cc1ccc(F)cc1	154.1	132.271	-0.16	-1.25	-1.82	-2.23	-2.19217	-1.9	-1.30783	-0.37									-1.58	[-2.24:-0.92]
4-Hydroxynirvanol	CCC1(NC(=O)NC1=O)c2ccc(O)cc2	221.1	147.842	0.427227	0.770146	1.60847	2.96446	3.43352	4.00894	4.69014	5.53757									-2.48	[-3.62:-1.34]
Acebutolol	CCCC(=O)Nc1ccc(OCC(O)CNC(C)C)c(c1)C(C)=O	337	190	0.329859	0.825094	1.6955	3.01956	3.84738	4.92942	6.17249	7.66917	0.95	1.1	1.5	2.3	2.8	3.7	4.7	5.9	-2.2	[-2.2:-2.16]
Acetaminophen	CC(=O)Nc1ccc(O)cc1	152.2	130.246	-0.555451	-1.1511	-1.70063	-1.90076	-1.62813	-1.04529	-0.0876893	1.2135	-5.05	-9.2	-16.7	-27.1	-33.4	-39.6	-45.6	-51	-1.03	[-1.1:-1.03]
Acetamiprid	CN(Cc1ccc(Cl)nc1)C(C)=NC#N	223.1	153.995	0.128073	-0.0918197	-0.245501	0.010323	0.319435	0.82535	1.52558	2.51572	-1.1	-2.3	-5.8	-11.2	-14.7	-19	-23.6	-28	-1.77	[-1.86:-1.68]
Acyclovir	NC1=NC(=O)c2ncn(COCCO)c2N1	226.1	143.992	0.51	1.15	2.24	4.25	5.54446	7.05	8.81554	10.89									-1.01	[-2.01:-0.01]
Adenine	Nc1ncnc2nc[nH]c12	136.1	121.373	-0.791836	-1.66266	-2.64348	-3.49101	-3.74702	-3.77904	-3.57108	-3.04661	-6.2	-11.1	-19	-28.6	-33.7	-38.5	-42.8	-46	-1.75	[-2.28:-1.13]
Alanine	C[C@H](N)C(O)=O	90.1	118.355	-0.785128	-2.96883	-6.07657	-9.42015	-11.0568	-12.465	-13.62	-14.5527	-7.65	-13.9	-26.4	-41.3	-52.1602	-63.7067	-76.7764	-91.4057	0.27	[0.25:0.29]
Alprazolam	Cc1nnc2CN=C(c3ccccc3)c4cc(Cl)ccc4n12	309.1	170.398	0.324946	0.935903	1.95038	3.39936	4.29724	5.532	6.95765	8.58971	0.4	0.2	-0.9	-2.8	-4.2	-5.9	-7.6	-9.2	-3.6	[-3.7:-3.5]
Amitriptyline	CN(C)CCC=C1c2ccccc2CCc3ccccc13	278.1	162.314	0.542169	1.22695	2.39834	4.22794	5.46275	6.98695	8.77401	10.8404	-0.4	-1.1	-1.7	-0.6	0.1	1.5	2.7	4.4	-4.57	[-4.7:-4.44]
Amphetamine	CC(N)Cc1ccccc1	136.1	130.004	-0.4892	-1.11807	-1.70415	-1.93092	-1.74916	-1.25263	-0.389628	0.841322	-4	-7.5	-13.9	-22	-26.5	-30.8	-34.6	-37.7	-0.87	[-1.41:-0.33]
Aspartic Acid	N[C@@H](CC(O)=O)C(O)=O	134.1	124.968	-0.803967	-2.06883	-3.70921	-5.48727	-6.30572	-6.9121	-7.30508	-7.41121	-6.15	-11.4	-22.2	-36.2	-44.2	-52.2	-60.1	-67.3	-0.47	[-1.71:0.77]
Atenolol	CC(C)NCC(O)COc1ccc(CC(N)=O)cc1	267	154.373	0.858438	2.08292	4.34757	8.00934	10.4196	13.3032	16.577	20.3157	-1.45	-3	-5	-5.3	-3.8	-1.7	0.3	3.1	-1.28	[-1.34:-1.25]
Bendroflumethiazide	N[S](=O)(=O)c1cc2c(NC(Cc3ccccc3)N[S]2(=O)=O)cc1C(F)(F)F	421.8	187.582	0.969114	1.67203	2.71294	4.30246	5.37777	6.6314	8.19799	9.92434	0.45	0.3	-0.3	-1	-1.9	-2.2	-2.9	-2.3	-3.59	[-3.64:-3.54]
Benzoylecgonine	CN1C2CCC1[C@H]([C@H](C2)OC(=O)c3ccccc3)C(O)=O	290.1	165.177	0.352671	0.828218	1.70785	3.07129	3.87676	5.02399	6.31064	7.74341	-0.5	-1.4	-3.2	-4.7	-5.3	-5.3	-5.2	-4.4	-2.14	[-3.02:-1.35]
Betaine	C[N+](C)(C)CC([O-])=O	118	116.317	-0.6	-1.17	-1.47	-1.22	-0.68075	0.23	1.56825	3.39									0.62	[0.02:1.22]
Bufuralol	CCc1cccc2cc(oc12)C(O)CNC(C)(C)C	262	159.47	0.584467	1.33867	2.62126	4.64444	6.02934	7.65162	9.58833	11.7914	-0.8	-1.8	-3	-2.7	-2.2	-0.6	0.5	2.3	-2.87	[-5.57:-1.03]
Buprenorphine	C[C@]([C@H]1C[C@@]23CC[C@@]1([C@H]4[C@@]25CCN([C@@H]3CC6=C5C(=C(C=C6)O)O4)CC7CC7)OC)(C(C)(C)C)O	468.3	204.949	0.915787	1.41661	2.34113	3.97735	4.97562	6.12449	7.48797	9.13457	1.15	1.7	2.3	3.4	4	5.1	6.1	7.6	NaN	NA
Buscopan	CCCC[N+]1(C)[C@H]2CC(C[C@H]1[C@@H]3O[C@H]23)OC(=O)C(CO)c4ccccc4	360.1	191.991	0.424662	1.0062	2.00389	3.52092	4.4864	5.68016	7.07829	8.73762	1.3	1.8	2.7	4.1	4.9	6	7.2	8.7	-3.6	[-5.77:-1.43]
Buspirone	O=C1CC2(CCCC2)CC(=O)N1CCCCN3CCN(CC3)c4ncccn4	386.3	188.315	0.675179	1.28983	2.33493	3.89303	4.85687	6.11519	7.50381	9.08073	1.4	2	3	4.3	5.1	6.1	7.4	8.8	-3.03	[-4.2:-1.86]
Caffeine	Cn1cnc2N(C)C(=O)N(C)C(=O)c12	195.1	134.19	-0.324698	-0.609715	-0.809216	-0.720652	-0.439688	0.0594554	0.612635	1.78595	-2.55	-4.6	-8.6	-14.7	-18.2	-22.1	-25.4	-28.5	-0.95	[-0.98:-0.92]
Carbamazepine	NC(=O)N1c2ccccc2C=Cc3ccccc13	237.1	149.21	0.285982	0.802831	1.77061	3.38872	4.52834	5.94505	7.61356	9.59562	-1.9	-3.7	-7.7	-12.3	-14.6	-16.4	-18	-18.7	-4.99	[-6.01:-3.97]
Carisoprodol	CCCC(C)(COC(N)=O)COC(=O)NC(C)C	261.1	163.046	0.420373	1	2.1	4	5.2	6.5	8.4	10.4	-2	-3.8	-6.9	-8.6	-9.1	-8.4	-7.9	-5.7	-2.94	[-2.94:-2.88]
Chloramphenicol	OCC(NC(=O)C(Cl)Cl)C(O)c1ccc(cc1)[N+]([O-])=O	323	168.259	0.0294562	0.593671	1.21263	1.82058	2.47014	2.96944	4.06224	5.26078									-2.11	[-2.17:-2.05]
Chlordiazepoxide	CN=C1CN(O)C(=C2C=C(Cl)C=CC2=N1)c3ccccc3	299.9	167.81	0.33	0.74	1.34	2.4	3.15342	4.08	5.19908	6.53									-2.77	[-3.59:-1.77]
Chlorpheniramine	CN(C)CCC(C1=CC=C(C=C1)Cl)C2=CC=CC=N2	275.1	162.957	0.6	1.06	2.37	4.39	5.79983	7.46	9.30767	11.28									-3.44	[-3.63:-3.25]
Chlorprothixene	CN(C)CC\C=C/1c2ccccc2Sc3ccc(Cl)cc13	316.1	168.47	0.413714	1.03658	2.10797	3.73794	4.7893	6.08963	7.62093	9.30349	-0.1	-0.6	-1.4	-1.2	-0.7	0.4	1.3	2.8	-6.74	[-6.75:-6.61]
Chlorthalidone	N[S](=O)(=O)c1cc(ccc1Cl)C2(O)NC(=O)c3ccccc23	338.9	173.388	0.490796	1.07216	1.95013	3.1148	3.80542	4.76454	5.77017	7.0057	0.1	-0.5	-1.4	-2.1	-3.8	-6.7	-7.5	-8.1	-3.45	[-3.47:-3.43]
Choline	C[N+](C)(C)CCO	104.1	111.942	-0.8616	-1.50694	-1.80818	-1.26525	-0.44156	0.861726	2.69353	5.07808	-6	-9	-14.1	-17.2	-15.9	-16.3	-15.4	-9.3	0.67	[0.64:0.67]
Cimetidine	CN=C(NCCSCc1nc[nH]c1C)NC#N	253.1	158.245	0.193522	0.414846	0.883249	1.78382	2.4734	3.47486	4.6588	6.19208	-2.05	-4.1	-7.3	-9.8	-10.8	-11	-11.2	-10.5	-2.08	[-3.07:-1.44]
Clenbuterol	CC(C)(C)NCC(O)c1cc(Cl)c(N)c(Cl)c1	277.1	159.377	0.624219	1.40469	2.66157	4.56852	5.86895	7.31597	9.06037	11.0397	-0.9	-2.1	-4.2	-6	-6.7	-6.8	-6.9	-6.1	-3.39	[-3.44:-3.34]
Clonazepam	[O-][N+](=O)c1ccc2NC(=O)CN=C(c3ccccc3Cl)c2c1	316.1	171.42	0.0436212	0.469036	1.01215	1.77156	2.49588	3.15264	4.30381	5.5331	-0.85	-2	-4.2	-6.8	-8.2	-9.7	-11.1	-12.2	-3.5	[-3.57:-3.5]
Clonidine	Clc1cccc(Cl)c1NC2=NCCN2	230	142.413	-0.0763105	-0.0809728	0.108689	0.749171	1.31122	2.13158	3.11832	4.51667	-2	-4	-8.4	-13.3	-15.5	-17.4	-18.9	-19.6	-0.11	[-0.24:-0.1]
Cocaine	COC(=O)[C@H]1[C@H](CC2CCC1N2C)OC(=O)c3ccccc3	304.1	170.712	0.430444	1.05277	2.13843	3.8035	4.87324	6.23155	7.85429	9.43241	-0.25	-0.4	-0.3	0.5	1.2	2	3.2	6	-2.24	[-2.26:-2.24]
Cotinine	CN1C(CCC1=O)c2cccnc2	177.1	140.479	-0.0635582	-0.481464	-0.918915	-0.992363	-0.834819	-0.51176	0.00362983	0.818354	-1.8	-3.5	-6.4	-10.3	-13	-16.4	-19.9	-23.3	-0.5	[-1.87:0.75]
Cyromazine	Nc1nc(N)nc(NC2CC2)n1	167.1	129.665	-0.0629733	-0.256626	-0.237879	0.36262	0.96501	1.8771	3.05897	4.63999	-3.45	-6.5	-11.6	-15.9	-17.3	-17.8	-18.1	-16.9	-1.11	[-1.15:-1.07]
Cytidine	NC1=NC(=O)N(C=C1)[C@@H]2O[C@H](CO)[C@@H](O)[C@H]2O	244.1	149.2	0.0974738	0.140569	0.333515	0.903114	1.39192	2.05286	2.91261	4.22095	-1.75	-3.6	-7.1	-11.2	-13.7	-16.3	-19	-21.3	-1.36	[-3.08:0.02]
Desalkylflurazepam	Fc1ccccc1C2=NCC(=O)Nc3ccc(Cl)cc23	289.1	161.824	0.39	0.81	1.56	2.75	3.61783	4.7	6.00467	7.54									-4.26	[-5.22:-3.3]
Desipramine	CNCCCN1c2ccccc2CCc3ccccc13	267.2	157.261	0.432832	0.96207	1.87033	3.31102	4.33121	5.59658	7.10846	8.88136	-0.15	-0.8	-2.7	-5.2	-6.4	-7.5	-8.3	-8.5	-4.23	[-5.27:-3.19]
Desomorphine	CN1CCC23C4CCCC2C1Cc5ccc(O)c(O4)c35	272	156.42	0.47894	1.04632	2.00642	3.47474	4.42587	5.61207	7.02938	8.63088	-0.8	-1.9	-4.4	-7.3	-8.7	-10.1	-11.1	-11.7	-2.74	[-3.72:-1.76]
Desoxypipradrol	C1CCNC(C1)C(C2=CC=CC=C2)C3=CC=CC=C3	252.1	165.58	0.38	0.92	1.86	3.43	4.49925	5.79	7.33075	9.15									-3.05	[-4.4:-1.79]
Diazepam	CN1C(=O)CN=C(c2ccccc2)c3cc(Cl)ccc13	285.1	163.41	0.35805	0.897435	1.79037	3.19304	4.19624	5.39344	6.8592	8.50098	-0.65	-1.6	-3.6	-6.3	-7.5	-8.5	-9.3	-9.5	-4.04	[-5.44:-2.64]
Dihydrocodeine	COc1ccc2C[C@@H]3[C@@H]4CC[C@H](O)[C@@H]5Oc1c2[C@]45CCN3C	302.2	163.342	0.48	1	1.9	3.19	4.0705	5.14	6.4095	7.89									-2.21	[-2.88:-1.54]
Dimetridazole	Cn1c(C)ncc1[N+]([O-])=O	141.9	124.72	-0.98	-2.24	-3.57	-4.85	-5.23492	-5.33	-5.06258	-4.36									-0.89	[-0.94:-0.89]
Diphenhydramine	CN(C)CCOC(c1ccccc1)c2ccccc2	256.2	162.08	0.574189	1.18661	2.31484	4.17718	5.40812	6.96251	8.78356	10.8873	-0.25	-1.1	-2.9	-4.2	-4.5	-4.3	-3.7	-2.2	-3.18	[-4.44:-1.92]
D-Pantothenic acid	CC(C)(CO)[C@H](O)C(=O)NCCC(O)=O	220.1	138.73	0.41848	0.65	1	2.2	2.9	4.1	5.4	7.3									0.66	[0.61:0.69]
Ephedrine	CN[C@@H](C)[C@H](O)c1ccccc1	166.1	133.425	-0.189487	-0.507671	-0.634553	-0.238124	0.2772	1.11251	2.28787	3.86134	-3.4	-6.5	-12.1	-17	-19	-20.4	-21.5	-21.4	-0.44	[-0.48:-0.43]
Epitestosterone	C[C@]12CC[C@H]3[C@@H](CCC4=CC(=O)CC[C@]34C)[C@@H]1CC[C@H]2O	289.1	162.18	0.282701	0.83748	1.73298	2.96327	3.78213	4.82027	6.08541	7.59498	-0.95	-2	-4	-5.7	-6.4	-6.9	-7.6	-8.1	-4.04	[-4.15:-3.93]
Ethylone	CCNC(C)C(=O)C1=CC2=C(C=C1)OCO2	222.1	148.921	-0.000419218	0.0154882	0.268922	1.04388	1.70896	2.5883	3.73921	5.20813	-2.25	-4.5	-8.7	-13.1	-15.1	-16.5	-17.7	-17.9	-2.34	[-2.92:-1.76]
Etodolac	CCc1cccc2c3CCOC(CC)(CC(O)=O)c3[nH]c12	288	168.834	0.526262	1.28322	2.44813	4.20158	5.49175	6.85353	8.56377	10.442	-1	-2.2	-3.9	-4.5	-4.7	-3.9	-2.8	-1.2	-2.88	[-3.85:-1.91]
Fenoterol	CC(Cc1ccc(O)cc1)NCC(O)c2cc(O)cc(O)c2	304.2	168.186	0.58	1.27	2.21	4.1	5.37425	6.84	8.48825	10.31									-2.91	[-3.86:-1.96]
Fentanyl	CCC(=O)N(C1CCN(CC1)CCc2ccccc2)c3ccccc3	337.2	186.769	0.585753	1.46103	2.87795	4.98821	6.38865	7.94658	9.78131	11.9743	0.9	1.1	1.9	3.8	4.9	6.5	8.2	10.1	-3.24	[-3.42:-3.23]
Fluoxetine	CNCCC(Oc1ccc(cc1)C(F)(F)F)c2ccccc2	310.1	177.32	0.62	1.38	2.66	4.62	5.91188	7.42	9.14062	11.07	-1	-1.8	-2.3	-1.7	-0.8	0.2	1.6	6	-3.71	[-3.77:-3.71]
Fluvoxamine	COCCCC/C(=N\OCCN)/C1=CC=C(C=C1)C(F)(F)F	319.2	171.219	0.317585	0.962884	2.06691	3.71882	4.91002	6.29264	8.18214	9.19726									-3.03	[-3.56:-2.5]
Gabapentin	NCC1(CCCCC1)CC(O)=O	172.1	133.287	0.00773702	-0.0334361	0.152742	0.883159	1.52998	2.36991	3.45817	4.89803	-3.85	-7.2	-13.3	-20.7	-24.4	-27.8	-30.8	-32.7	-0.75	[-1.76:0.26]
Guanine	NC1=Nc2nc[nH]c2C(=O)N1	152.3	129.71	-0.158386	-0.9	-1.9	-2.67919	-2.72868	-2.59966	-2.06765	-1.18978									-3.71	[-4.43:-2.89]
Guanosine	NC1=Nc2n(cnc2C(=O)N1)[C@@H]3O[C@H](CO)[C@@H](O)[C@H]3O	284.3	157.903	0.489403	0.629266	1.0216	1.90301	2.4673	3.31178	4.28114	5.52059	-1.5	-3.3	-7.2	-12	-14.8	-17.6	-20.5	-22.9	-1.35	[-1.77:-0.82]
Haloperidol	OC1(CCN(CCCC(=O)c2ccc(F)cc2)CC1)c3ccc(Cl)cc3	376.1	191.003	0.34016	0.809929	1.6454	2.92843	3.71654	4.74958	5.92806	7.32349	1.25	1.7	2.4	3.6	4.3	5.2	6.3	7.6	-4.43	[-4.46:-4.4]
Histamine	NCCc1c[nH]cn1	111.8	115.729	-1.09036	-2.45811	-3.66796	-4.10396	-4.03536	-3.54838	-2.554	-1.06486	-6.2	-11.4	-20.4	-28.3	-31.1	-32.8	-33.8	-33	0.3	[-0.39:0.99]
Hydrocodone	COc1ccc2C[C@@H]3[C@@H]4CCC(=O)[C@@H]5Oc1c2[C@]45CCN3C	300.2	167.88	0.359247	0.851484	1.72246	3.08145	3.93136	5.02813	6.27985	7.75972	-0.5	-1.4	-3.6	-6.4	-7.9	-9.4	-10.8	-11.7	-3.23	[-3.9:-2.66]
Imipramine	CN(C)CCCN1c2ccccc2CCc3ccccc13	281.2	160.764	0.53	1.2	2.36	4.16	5.37533	6.82	8.49717	10.41									-4.3	[-4.34:-4.26]
Indoprofen	CC(C(O)=O)c1ccc(cc1)N2Cc3ccccc3C2=O	282.1	167.184	0.0626669	0.549165	1.37629	2.63155	3.52433	4.63545	5.91557	7.41721	-0.5	-1.3	-1.8	-0.9	0	1.1	1.9	2.6	-4.8	[-4.91:-4.69]
Ketamine	CNC1(CCCCC1=O)c2ccccc2Cl	238.1	144.498	0.3	0.72	1.5	2.86	3.83904	5.06	6.55346	8.35									-0.15	[-0.35:-0.14]
Ketoconazole	CC(=O)N1CCN(CC1)c2ccc(OC[C@H]3CO[C@@](Cn4ccnc4)(O3)c5ccc(Cl)cc5Cl)cc2	531.1	211.659	0.802258	1.20018	1.98602	3.37131	4.19985	5.20419	6.47881	7.89085	1.45	2	2.8	3.9	4.6	5.5	6.7	8	-3.8	[-3.85:-3.75]
Ketoprofen	CC(C(O)=O)c1cccc(c1)C(=O)c2ccccc2	255.1	153.51	0.632756	0.72857	1.22773	2.96721	4.35125	5.9	7.4	9.03701	-1.6	-3.1	-4.6	-5	-5.2	-4.1	-3.2	-2.8	-3.32	[-3.38:-3.26]
Ketorolac	OC(=O)C1CCn2c1ccc2C(=O)c3ccccc3	256.1	156.815	0.0790768	0.846204	1.78556	3.18346	4.94614	6.66588	8.62294	10.9034	-1.55	-3.3	-7.1	-12.1	-14.7	-17.2	-19.5	-21	-3.46	[-4.34:-2.58]
Lacosamide	COC[C@@H](NC(C)=O)C(=O)NCc1ccccc1	251.1	157.954	0.537778	1.09353	2.05737	3.68958	4.91516	6.5661	8.2231	10.275	-2.2	-4.1	-6.5	-7.3	-7.4	-6	-3.7	-1.6	-2.89	[-3.86:-1.92]
Lamotrigine	Nc1nnc(c(N)n1)c2cccc(Cl)c2Cl	256	152.68	0.0840278	0.191369	0.438897	0.987937	1.46968	2.10329	2.97297	4.09365	-1.3	-2.8	-5.8	-10	-12.7	-15.5	-18.4	-21	-4.37	[-5.96:-2.78]
L-arginine	N[C@@H](CCCNC(N)=N)C(O)=O	175.2	129.146	0.00281763	0.0402573	0.35817	1.28817	2.10649	3.19297	4.65776	6.4616	-4.3	-8	-13	-16.8	-18.1	-18.6	-18.2	-16.3	0.02	[-0.03:0.02]
L-asparagine	N[C@@H](CC(N)=O)C(O)=O	133.1	125.085	-0.983548	-2.25381	-3.78516	-5.29162	-5.93446	-6.35745	-6.47321	-6.29881	-5.75	-10.7	-21.3	-35.3	-42.6	-48.7	-54.9009	-57.5339	-0.73	[-0.78:-0.68]
L-glutamic acid	N[C@@H](CCC(O)=O)C(O)=O	148.1	127.372	-0.696626	-1.63329	-2.70867	-3.67189	-3.98772	-4.01758	-3.85104	-3.31737	-5.9	-11	-21.2	-34.4	-41.3	-47.6	-53.9485	-57.7172	-0.16	[-0.87:0.36]
L-glutamine	N[C@@H](CCC(N)=O)C(O)=O	147.1	126.959	-0.42255	-0.614421	-0.602672	-0.255145	0.211743	0.978912	2.06362	3.52215	-5.45	-10.2	-17.1	-24.2	-27	-28.8	-30.3	-30.2	-0.55	[-0.6:-0.5]
L-Glycine	NCC(O)=O	76	116.615	-0.322719	-3.07777	-7.7836	-13.6394	-16.6509	-19.6595	-22.6617	-25.6541	-7.8	-14	-26.8	-44	-56.0057	-69.3682	-84.7067	-102.031	0.52	[0.51:0.53]
L-histidine	N[C@@H](Cc1c[nH]cn1)C(O)=O	156.1	127.682	-0.490468	-1.08298	-1.62455	-1.80847	-1.64631	-1.19743	-0.388687	0.744841	-5.15	-9.6	-17.6	-25.9	-29.4	-32	-34.1	-34.6	-0.49	[-0.65:-0.33]
Lidocaine	CCN(CC)CC(=O)Nc1c(C)cccc1C	235.1	156.815	0.446551	0.906936	1.68764	3.1242	4.36651	5.86521	7.45797	9.47104	-0.95	-2.2	-2.4	-0.7	0.8	2.1	3.9	5.8	-1.76	[-1.83:-1.69]
L-Isoleucine	CC[C@H](C)[C@H](N)C(O)=O	132.1	128.156	-0.397058	-1.2949	-2.37147	-3.26153	-3.51734	-3.50298	-3.19374	-2.54988	-5.15	-9.6	-18.4	-29.3	-35.2	-41.3	-47.3	-52.1	-0.58	[-0.62:-0.54]
L-leucine	CC(C)C[C@H](N)C(O)=O	132.1	129.822	-0.416042	-1.2948	-2.3588	-3.25868	-3.51231	-3.5039	-3.19126	-2.54753	-5.15	-9.6	-18.4	-29.3	-35.2	-41.3	-47.3	-52.1	-0.85	[-0.9:-0.8]
L-lysine	NCCCC[C@H](N)C(O)=O	147.2	123.446	-0.392505	-0.59206	-0.59579	-0.252342	0.211753	0.969039	2.06686	3.52135	-5.45	-10.2	-17.1	-24.1	-27.1	-28.7	-30.1	-30.1	0.83	[0.79:0.84]
L-methionine	CSCC[C@H](N)C(O)=O	150.1	127.278	-0.658544	-1.38029	-2.15045	-2.74739	-2.79185	-2.57336	-2.03399	-1.101	-4.85	-9.1	-17.9	-29.2	-35.1	-40.8	-46.3	-50	-0.46	[-0.51:-0.41]
Loperamide	CN(C)C(=O)C(CCN1CCC(O)(CC1)c2ccc(Cl)cc2)(c3ccccc3)c4ccccc4	477.2	221.8	0.7648	1.36569	2.30198	3.76075	4.78969	5.86034	7.16855	8.72386	1.55	2.1	3.2	4.5	5.3	6.3	7.5	8.9	-4.66	[-6.04:-3.28]
Lovastatin	CC[C@H](C)C(=O)O[C@H]1C[C@@H](C)C=C2C=C[C@H](C)[C@H](CC[C@@H]3C[C@@H](O)CC(=O)O3)[C@@H]12	405.2	186.933	0.580413	1.75256	3.20932	4.73245	5.9614	7.43524	9.09215	10.9857	1.25	1.6	2.1	2.1	1.8	1.9	1.5	1.2	-6	[-6:-5.96]
L-phenylalanine	N[C@@H](Cc1ccccc1)C(O)=O	166.1	136.059	-0.127073	-0.645272	-1.20473	-1.47873	-1.40875	-1.07592	-0.447863	0.456147	-4.05	-7.7	-14.9	-23.9	-28.8	-33.9	-38.9	-37.5	-0.87	[-0.89:-0.85]
L-proline	OC(=O)[C@@H]1CCCN1	116.1	120.112	-1.18879	-2.78687	-4.76365	-6.73393	-7.57154	-8.15134	-8.3823	-8.22613	-5.95	-11	-21.7	-35.7	-43.2	-50.7	-58.2	-65.7	0.48	[0.45:0.51]
L-serine	N[C@@H](CO)C(O)=O	106.1	120.17	-1.03248	-2.86534	-5.41945	-8.34165	-9.79336	-11.0991	-12.1942	-12.9574	-6.7	-12.3	-23.7	-38.3	-46.5	-53.7555	-59.9197	-63.3088	0.19	[0.17:0.21]
L-threonine	C[C@@H](O)[C@H](N)C(O)=O	120	122.417	-0.928572	-2.38737	-4.22752	-6.07768	-6.89153	-7.47785	-7.77674	-7.73072	-5.9	-10.9	-21.4	-35	-42.2	-49.5345	-55.9541	-60.4715	-0.03	[-0.03:-0.01]
L-tryptophan	N[C@@H](Cc1c[nH]c2ccccc12)C(O)=O	205.1	145.459	0.220989	0.0632834	0.00963063	0.41749	0.796486	1.38122	2.14478	3.08934	-2.8	-5.6	-11.2	-17.8	-21.5	-25.3	-29.1	-30.5	-1.2	[-1.24:-1.2]
L-Tyrosine	N[C@@H](Cc1ccc(O)cc1)C(O)=O	182.1	140.753	0.365872	-0.6	-1.6	-1.8	-1.9	-1.8	-1.4	-0.9	-3.5	-6.8	-13.4	-21.5	-26.1	-30.8	-35.7	-34.6	-2.59	[-2.59:-2.54]
L-Valine	CC(C)[C@H](N)C(O)=O	118.1	123.606	-0.652123	-1.8103	-3.23283	-4.53454	-4.99356	-5.22257	-5.03965	-4.54331	-5.9	-10.9	-20.9	-33.3	-40.1	-46.9	-51.1	-56.1	-0.24	[-0.25:-0.19]
Malic Acid	OC(CC(O)=O)C(O)=O	135.1	120.224	0.402288	-1.54349	-3.94457	-5.50289	-6.27546	-7.09358	-7.2773	-7.42295	-5.95	-11.2	-22.3	-36	-44	-52.1059	-58.8613	-63.0446	0.71	[0.65:0.77]
Maprotiline	CNCCCC12CCC(c3ccccc13)c4ccccc24	278.2	160.505	0.55	1.24	2.41	4.25	5.48029	6.94	8.64221	10.6									-4.88	[-6.75:-3.01]
Melamine	Nc1nc(N)nc(N)n1	127.1	119.54	-0.867779	-1.78634	-2.77229	-3.56113	-3.73151	-3.64957	-3.24938	-2.48316	-4.9	-8.8	-15.9	-25.5	-30.3	-34.6	-38.3	-40.7	-1.55	[-1.58:-1.52]
Melatonin	COc1ccc2[nH]cc(CCNC(C)=O)c2c1	233.1	148.862	0.556124	1.07368	1.9051	3.2838	4.2923	5.65848	7.25863	9.08534	-1	-2.2	-3.4	-4.1	-4.8	-5.5	-7.1	-8.9	-2.36	[-3.06:-1.66]
Meprobamate	CCCC(C)(COC(N)=O)COC(N)=O	219.1	143.162	0.224263	0.83145	1.78245	3.56312	5.37876	7.2	8.94307	10.4413	-3.5	-6.5	-13.8	-22	-25.5	-27.7	-29.9	-29.7	-1.7	[-1.76:-1.64]
Methamphetamine	CN[C@@H](C)Cc1ccccc1	150	133.161	0.0111776	-0.20987	-0.165237	0.569677	1.28788	2.3179	3.65292	5.60749	-3.55	-6.8	-12.7	-19.8	-23.3	-26.8	-29.9	-31.8	-1.5	[-2.86:-0.14]
Methylhistamine	CNCCc1c[nH]cn1	126	120.668	-0.863584	-1.71627	-2.46443	-2.70917	-2.44319	-1.78664	-0.673786	0.909187	-5.45	-10.1	-18	-24.7	-27.2	-28.5	-29.7	-28.6	0.43	[0.02:0.84]
Metoprolol	COCCc1ccc(OCC(O)CNC(C)C)cc1	268	162.599	0.569988	1.03	1.89	3.43	4.50683	5.81	7.35817	9.17									-1.2	[-1.27:-1.2]
Midazolam	Cc1ncc2CN=C(c3ccccc3F)c4cc(Cl)ccc4n12	326.1	172.965	0.460749	1.00001	1.97913	3.53087	4.49597	5.7372	7.15344	8.8327	-0.25	-1	-2.6	-5.4	-7	-8.2	-9.4	-9.8	-4.29	[-5.55:-3.03]
monoxidil	C1CCN(CC1)C2=NC(=N)N(C(=C2)N)O	210.1	143.03	0.0182659	0.105392	0.39257	1.12299	1.75898	2.54171	3.56707	4.86858	-0.85	-2.1	-5.4	-9.8	-12.5	-15.3	-17.8	-19.9	-1.99	[-2.01:-1.97]
Monuron	CN(C)C(=O)Nc1ccc(Cl)cc1	199	140.87	0	-0.1	-0.09	0.45	1.03675	1.9	3.09075	4.66									-2.9	[-2.93:-2.78]
Morphine	CN1CC[C@]23[C@H]4Oc5c(O)ccc(C[C@@H]1[C@@H]2C=C[C@@H]4O)c35	286.1	160.195	0.329325	0.749925	1.45536	2.51867	3.23381	4.14863	5.24877	6.52263	-0.9	-2.2	-4.8	-8	-9.8	-11.5	-13.4	-15.1	-3.28	[-3.33:-3.23]
Naloxone	Oc1ccc2C[C@H]3N(CC[C@@]45[C@@H](Oc1c24)C(=O)CC[C@@]35O)CC=C	328.1	169.919	0.348832	0.824367	1.67529	2.97969	3.75717	4.81502	6.01876	7.34085	-0.45	-1.3	-2.2	-2	-1.6	-0.6	0.3	1.5	-2.56	[-3.73:-1.39]
Naproxen	COc1ccc2cc(ccc2c1)C(C)C(O)=O	231.1	150.859	0.467405	1.07799	1.9846	3.3617	4.24091	5.20178	7.19168	8.7713									-4.24	[-4.24:-4.21]
Niacinamide (Nicotinamide)	C1=CC(=CN=C1)C(=O)N	123.1	123.233	-1.08844	-2.51739	-4.21431	-5.76425	-6.35079	-6.66159	-6.61758	-6.21709	-4.2	-7.4	-12.6	-21.3	-26.7	-32.1	-37	-41.3	0.68	[0.59:0.69]
Nicotinic acid (Niacin)	C1=CC(=CN=C1)C(=O)O	124.1	120.355	-1.05779	-2.5336	-4.30841	-5.94855	-6.57573	-6.91404	-6.91595	-6.53938	-6.65	-12	-20.9	-31.4	-37.6	-43.2	-48.6923	-53.0776	-0.85	[-0.97:-0.73]
Nifenazone	CN1N(c2ccccc2)C(=O)C(=C1C)NC(=O)c3cccnc3	309.1	170.72	0.66	1.22	2.39	4.18	5.75171	7.65	9.59329	11.3									-3.68	[-4.47:-2.89]
Nitrazepam	[O-][N+](=O)c1ccc2NC(=O)CN=C(c3ccccc3)c2c1	282.1	166.22	0.5	0.97	1.75	3	3.91275	5.02	6.29475	7.71									-3.8	[-3.91:-3.69]
N-methylephedrine	CC(C(O)c1ccccc1)N(C)C	180.1	134.989	0	-0.03	0.23	0.97	1.65212	2.61	3.88787	5.53									-1.27	[-2.04:-0.5]
Norbuprenorphine	CO[C@]12CC[C@@]3(C[C@@H]1[C@](C)(O)C(C)(C)C)[C@H]4Cc5ccc(O)c6O[C@@H]2[C@]3(CCN4)c56	414.3	193.216	0.767737	1.47747	2.48133	3.79258	4.6621	5.76966	6.99644	8.47358	0.55	0.6	-0.1	-1.2	-1.7	-2.7	-2.6	-3.1	-2.93	[-4.41:-1.45]
Norcodeine	COc1ccc2CC3NCCC45C(Oc1c24)C(O)C=CC35	286.1	166.203	0.317037	0.751906	1.46894	2.525	3.23885	4.14691	5.26099	6.52093	-0.9	-2.2	-4.9	-7.9	-9.7	-11.5	-13.4	-15	-2.66	[-3.38:-1.94]
Norepinephrine	NCC(O)c1ccc(O)c(O)c1	170.1	136.035	0.58	1.25	2.45	4.32	5.56175	7.05	8.82075	10.91									-0.9	[-2.4:0.47]
Norfentanyl	CC(=O)CN(C1CCNCC1)c2ccccc2	233.2	151.22	0.4	0.93	1.85	3.41	4.48117	5.78	7.33633	9.18									-2.58	[-3.62:-1.54]
Normeperidine	CCOC(=O)C1(CCNCC1)c2ccccc2	234.1	154.126	0.396026	0.913968	1.89985	3.58663	4.71749	6.11055	7.71981	9.60107	-2.1	-4.2	-8.5	-13.8	-16.9	-20	-22.8	-25.2	-2.48	[-3.44:-1.52]
Noroxycodone HCL	COc1ccc2C[C@H]3NCC[C@@]45[C@@H](Oc1c24)C(=O)CC[C@@]35O	302.1	163.46	0.343978	0.873152	1.76578	3.06501	3.8502	4.91173	6.10407	7.40382	-0.7	-1.9	-3.9	-6.4	-7.8	-9.2	-10.8	-10.6	-2.54	[-3.22:-1.86]
Norsertraline HCL	N[C@H]1CC[C@@H](c2ccc(Cl)c(Cl)c2)c3ccccc13	292.06	162.643	0.366464	1.13838	2.2396	3.36563	3.97864	5.15024	6.72056	8.72552	-1.15	-2.4	-5	-7.9	-9.4	-11	-12.5	-13.8	-4.39	[-6.62:-2.07]
Nortriptyline	CNCCC=C1c2ccccc2CCc3ccccc13	264	164.099	0.347585	0.84614	1.71255	3.09498	4.06855	5.30213	6.81434	8.59292	-0.4	-1.4	-3.1	-5.6	-7.1	-8.5	-9.9	-10.4	-4	[-6.61:-1.39]
O-Desmethyl-cis-tramadol HCL	CN(C)CC1CCCCC1(C2=CC(=CC=C2)O)O	250.1	151.786	0.425997	1.00414	2.03417	3.70424	4.86191	6.28591	8.02058	10.0135	0.3	0.1	0.5	2	2.9	4.2	5.6	7.3	-1.94	[-2.5:-1.38]
Oxazepam	OC1N=C(c2ccccc2)c3cc(Cl)ccc3NC1=O	287.1	160.745	0.341523	0.83655	1.66839	2.95874	3.88119	5.00715	6.41287	8.04701	-1.65	-3.4	-6.3	-8.7	-9.6	-9.8	-10	-9.1	-3.95	[-4.03:-3.87]
Oxymorphone	CN1CC[C@]23[C@H]4Oc5c(O)ccc(C[C@@H]1[C@]2(O)CCC4=O)c35	302.1	161.06	0.383454	0.87559	1.75128	3.08847	3.86464	4.92533	6.12348	7.48811	-0.95	-2.2	-4.2	-6.2	-7.5	-9.5	-11	-10.7	-2.65	[-3.78:-1.52]
Pamaquine	CCN(CC)CCCC(C)Nc1cc(OC)cc2cccnc12	316.2	173.782	0.518009	1.2024	2.35276	4.11187	5.26657	6.67438	8.37945	9.95921	1.45	2	3.1	4.9	6	7.3	8.7	10.4	-3.62	[-4.42:-2.82]
Pentedrone	CCCC(C(=O)C1=CC=CC=C1)NC	192.1	146.675	0.09	-0.03	0.25	1.02	1.71554	2.69	3.99196	5.67									-2.3	[-3.44:-1.16]
Perphenazine	OCCN1CCN(CCCN2c3ccccc3Sc4ccc(Cl)cc24)CC1	404.2	192	0.822585	1.41609	2.47849	4.30195	5.47084	6.71484	8.24329	10.0567	1.5	2.1	3.1	4.6	5.6	6.8	8	9.5	-5.31	[-6.69:-3.98]
Phenacetin	CCOc1ccc(NC(C)=O)cc1	180	140.431	-0.0752856	-0.299024	-0.296823	0.359328	1.03675	2.01201	3.32043	5.05288	-3.6	-6.7	-12.5	-20.5	-25.3	-29.9	-34.4	-38.2	-2.37	[-2.43:-2.31]
Pheniramine	CN(C)CCC(c1ccccc1)c2ccccn2	241.2	154.61	0.52	1.28	2.63	4.89	6.42908	8.24	10.3084	12.62									-2.98	[-4.36:-1.79]
phenyltoloxamine	CN(C)CCOc1ccccc1Cc2ccccc2	256.2	153.692	0.377369	0.944324	2.01125	3.7901	5.04918	6.65845	8.59876	10.8807	0.8	0.9	1.6	3.3	4.4	5.8	7.4	9.3	-4	[-5.52:-2.48]
Prazosin	COC1=C(C=C2C(=C1)C(=NC(=N2)N3CCN(CC3)C(=O)C4=CC=CO4)N)OC	383.8	197.627	0.47863	1.17567	2.27716	3.83769	4.82197	6.01562	7.38089	8.88683	0.9	1.1	1.4	2.4	3	4.1	5.2	6.5	-3.68	[-5.2:-2.16]
Prednisolone	C[C@]12C[C@H](O)[C@H]3[C@@H](CCC4=CC(=O)C=C[C@]34C)[C@@H]1CC[C@]2(O)C(=O)CO	361.1	177.841	0.420664	0.933208	1.79099	2.99808	3.68736	4.77803	5.82389	7.08354	0.2	-0.3	-1.1	-1.7	-2.2	-2.4	-2.9	-3.7	-3.2	[-3.22:-3.18]
Progesterone	CC(=O)[C@H]1CC[C@H]2[C@@H]3CCC4=CC(=O)CC[C@]4(C)[C@H]3CC[C@]12C	315.2	172.018	0.210288	0.651577	1.42179	2.52852	3.18995	4.09937	5.12581	6.29523	-0.8	-1.8	-3.7	-5.6	-6.4	-6.8	-7.5	-7.8	-4.47	[-4.52:-4.42]
Propafenone	CCCNCC(O)COc1ccccc1C(=O)CCc2ccccc2	342.2	175.049	0.562421	1.47007	2.98903	5.29483	6.85572	8.62329	10.7415	13.395	1.1	1.4	2.4	4.3	5.6	7.2	9.1	11.2	-3.58	[-4.74:-2.42]
Protriptyline	CNCCCC1c2ccccc2C=Cc3ccccc13	264	159.234	0.381198	0.852905	1.69975	3.09188	4.06144	5.28672	6.77206	8.54765	-1	-2.3	-5.1	-8	-9.4	-10.3	-11.1	-10.7	-4.9	[-6.74:-3.06]
Pseudoephedrine	CN[C@@H](C)[C@@H](O)c1ccccc1	166.1	134.852	-0.192589	-0.513942	-0.680217	-0.292177	0.235315	1.02518	2.13722	3.65257	-3.4	-6.5	-12.1	-19	-21.9	-24.1	-25.8	-25.7	-0.44	[-0.48:-0.43]
Pyridoxal	Cc1ncc(CO)c(C=O)c1O	168.1	127.488	0.395579	-0.238882	-0.818927	-0.488887	-0.13366	0.369328	1.62763	3	-4.4	-8.2	-15.4	-23.9	-28.1	-31.6	-34.4	-34.7	0.43	[0.38:0.48]
Quinidine	COc1ccc2nccc([C@H](O)[C@H]3C[C@@H]4CCN3C[C@@H]4C=C)c2c1	325.2	174.714	0.518071	1.19411	2.30341	4.00455	5.10771	6.40207	7.90946	9.40275	-0.55	-1.5	-3	-4	-4.2	-3	-2.3	-0.8	-3.01	[-3.06:-2.96]
R-(-)-Nirvanol	CCC1(NC(=O)NC1=O)c2ccccc2	205.1	144.497	0.510128	0.7263	1.39589	2.47219	2.58308	2.89144	3.36163	3.81802									-2.63	[-3.09:-2.17]
Ractopamine	CC(CCc1ccc(O)cc1)NCC(O)c2ccc(O)cc2	302	166.206	0.71	1.52	2.91	4.19	5.37087	6.96	8.82162	10.82									-2.57	[-3.63:-1.51]
ranitidine	CNC(/NCCSCc1oc(CN(C)C)cc1)=C\[N+]([O-])=O	315.2	166.677	0.395388	0.926383	1.88071	3.35969	4.31299	5.56871	7.02738	8.70801	1.15	1.4	2.2	3.7	4.7	5.8	7.1	8.6	-1.89	[-3.3:-0.48]
Retigabine	CCOC(=O)Nc1ccc(NCc2ccc(F)cc2)cc1N	304	178.026	0.54	1.19	2.32	4.04	5.25458	6.72	8.41542	10.32									-5.41	[-6.45:-4.37]
Ritalinic Acid	OC(=O)C(C1CCCCN1)c2ccccc2	220.1	146.505	0.238742	0.629095	1.41588	2.85682	3.9058	5.20902	6.76197	8.66915	-2.95	-5.7	-10.1	-13.8	-15.2	-15.6	-16	-14.5	-1.55	[-2.17:-0.93]
S-(+)-Ibuprofen	CC(C)Cc1ccc(cc1)C(C)C(O)=O	207.1	150.609	0.42071	0.921474	1.87967	3.52408	4.43473	5.00757	6.46503	8.21594									-3.76	[-3.8:-3.71]
Safranin O	Cc1cc2nc3cc(C)c(N)cc3[n+](c4ccccc4)c2cc1N	315.1	176.272	0.314687	0.861537	1.81815	3.24026	4.13662	5.30656	6.71087	8.32678	1.2	1.6	2.5	3.8	4.7	5.8	7.1	8.5	-4.2	[-7.55:-0.85]
Salbutamol	CC(C)(C)NCC(O)c1ccc(O)c(CO)c1	240.1	152.358	0.486796	1.10334	2.21363	4.07217	5.33297	6.8307	8.58716	10.5735	-0.7	-1.8	-3.6	-5	-5.5	-5.3	-5	-3.5	-1.22	[-1.27:-1.17]
Salicylic Acid	OC(=O)c1ccccc1O	139	120.555	-1.01564	-1.79563	-3.00788	-4.69423	-5.28104	-5.65405	-5.77367	-5.65537	-4.85	-8.8	-20.1	-29	-35	-40.9119	-46.52	-51.874	-0.97	[-1.83:-0.11]
Sarcosine	CNCC(O)=O	89.8	116.507	-0.829685	-2.96959	-6.05322	-9.42502	-11.0417	-12.4666	-13.6359	-14.5078	-7.6	-13.9	-26.5	-41.5	-49.2167	-56.8198	-63.3642	-67.9434	0.53	[0.51:0.55]
Selegiline	C[C@H](Cc1ccccc1)N(C)CC#C	188.1	139.807	0.230493	0.691258	1.79322	3.93688	5.51461	7.41162	9.67268	12.3039	-1.8	-3.5	-4.5	-3.9	-2.6	-0.1	1.7	3.8	-4.34	[-4.35:-4.2]
Sotalol	CC(C)NCC(O)c1ccc(N[S](C)(=O)=O)cc1	273.1	162.811	0.454011	1.05437	2.07899	3.64038	4.70341	6.01493	7.57664	9.38479	0.3	0	0.1	0.9	1.3	1.9	2.4	3.2	-2.25	[-2.81:-1.69]
Sulfadiazine	Nc1ccc(cc1)[S](=O)(=O)Nc2ncccn2	251.1	153.355	0.0461929	0.285379	0.676267	1.39386	2.02572	2.87111	3.96523	5.37609	-1.95	-3.9	-6.2	-7.7	-8.1	-7.8	-7.6	-5.3	-3.48	[-3.53:-3.43]
Sulfamerazine	Cc1ccnc(N[S](=O)(=O)c2ccc(N)cc2)n1	265	156.288	0.283402	0.689191	1.44561	2.68274	3.53125	4.64283	6.02816	7.60134	-0.95	-2.1	-3.5	-3.6	-3.5	-1.9	-0.8	0.6	-2.4	[-2.47:-2.4]
Sulfamethazine (Sulfadimidine)	Cc1cc(C)nc(N[S](=O)(=O)c2ccc(N)cc2)n1	278.9	159.811	0.436167	0.863688	1.70691	3.13636	4.05061	5.31135	6.80939	8.47866	0.05	-0.4	-0.6	0.1	1.1	2.2	3.4	4.9	-2.36	[-2.41:-2.31]
Sulpiride	CCN1CCCC1CNC(=O)c2cc(ccc2OC)[S](N)(=O)=O	342.1	185.449	0.352608	0.869254	1.75664	3.08215	3.90106	4.98165	6.18281	7.59292	1.3	1.8	2.5	3.8	4.6	5.6	6.7	8.1	-2.88	[-2.92:-2.84]
Tamoxifen	CC/C(c1ccccc1)=C(c2ccccc2)/c3ccc(OCCN(C)C)cc3	372.1	200.251	0.594459	1.51803	2.99295	5.12952	6.51934	8.06033	9.84511	11.9786	0.05	-0.5	-1.8	-3.1	-3.7	-3.8	-3.8	-2.4	-5.32	[-7.1:-3.54]
Tapentadol	CC[C@H]([C@@H](C)CN(C)C)c1cccc(O)c1	222.1	148.117	0.333942	0.857745	1.89251	3.74699	5.07789	6.68927	8.61412	10.8374	0.2	-0.1	0.4	2.1	3.1	4.5	6.1	8	-3.54	[-4.47:-2.44]
Taurocholic Acid	C[C@H](CCC(=O)NCC[S](O)(=O)=O)[C@H]1CC[C@H]2[C@@H]3[C@H](O)C[C@@H]4C[C@H](O)CC[C@]4(C)[C@H]3C[C@H](O)[C@]12C	516.3	195.216	0.851872	1.81834	3.42112	5.76306	7.34126	9.24436	11.5483	14.1788	0.65	0.5	-0.2	-1.1	-1.6	-1.7	-2.1	-2.2	-4.17	[-5.2:-3.14]
Temazepam	CN1C(=O)C(O)N=C(c2ccccc2)c3cc(Cl)ccc13	301.1	164.255	0.300584	0.914327	1.96434	3.44109	4.30078	5.59988	7.03182	8.59538	-0.7	-1.7	-3.5	-4.8	-5.1	-4.7	-3.5	-2.3	-5.42	[-6.9:-3.94]
Terbutaline	CC(C)(C)NCC(O)c1cc(O)cc(O)c1	226.1	151.344	0.442302	1.06525	2.19671	4.07313	5.35203	6.86337	8.64208	10.6907	-1.85	-3.8	-6.6	-8.4	-9	-8.6	-8.3	-6.6	-1.33	[-2.35:-0.31]
Terfenadine	CC(C)(C)c1ccc(cc1)C(O)CCCN2CCC(CC2)C(O)(c3ccccc3)c4ccccc4	472.3	231.073	0.754419	1.52988	2.76556	4.49246	5.58968	6.83628	8.34624	9.98793	1.45	2	2.8	4	4.9	6	7.3	8.7	-6.69	[-6.69:-6.59]
Testosterone	C[C@]12CC[C@H]3[C@@H](CCC4=CC(=O)CC[C@]34C)[C@@H]1CC[C@@H]2O	289.2	163.83	0.31408	0.768889	1.59845	2.85879	3.54807	4.57753	5.69948	6.91959	-0.85	-1.9	-4	-5.6	-6.4	-6.8	-7.6	-7.9	-4.04	[-4.15:-3.93]
Thymine	CC1=CNC(=O)NC1=O	127.1	118.313	-0.863905	-1.79215	-2.7278	-3.47443	-3.80729	-3.8627	-3.54721	-2.75619	-5.1	-9.3	-16	-24.6	-27.2	-28.3	-29.8	-29.7	-1.51	[-1.54:-1.48]
Tolbutamide	CCCCNC(=O)N[S](=O)(=O)c1ccc(C)cc1	271.1	164.914	-0.0684599	0.473384	1.37959	2.661	3.77313	5.34612	6.94211	8.70256	-1.8	-3.5	-6.6	-9.6	-11.2	-12.5	-14.2	-15	-3.42	[-3.46:-3.38]
Tramadol	CN(C)C[C@H]1CCCC[C@@]1(C2=CC(=CC=C2)OC)O	264.2	158.29	0.536156	1.19604	2.35961	4.23075	5.49152	7.02484	8.85101	10.949	0.8	0.9	1.7	3.5	4.6	6	7.5	9.3	-4.05	[-4.69:-3.41]
Trimethoprim	COc1cc(Cc2cnc(N)nc2N)cc(OC)c1OC	291.1	170.803	0.49	0.91	1.88	3.36	4.33	5.5	6.9125	8.61									-2.88	[-2.99:-2.77]
Trimipramine	CC(CN(C)C)CN1c2ccccc2CCc3ccccc13	295.2	166.376	0.65	1.23	2.56	4.33	5.59638	7.13	8.87363	10.77									-4.26	[-4.58:-3.94]
Uracil	O=C1NC=CC(=O)N1	113	115.172	-0.890216	-2.068	-3.12798	-3.61168	-3.55134	-3.15569	-2.27843	-0.77328									-1.49	[-1.51:-1.45]
Urapidil	COc1ccccc1N2CCN(CCCNC3=CC(=O)N(C)C(=O)N3C)CC2	388.2	184.834	0.64947	1.16783	2.05928	3.50648	4.46758	5.54033	6.84927	8.42539	1.3	1.8	2.5	3.7	4.4	5.4	6.6	7.9	-2.44	[-4.09:-0.79]
Uridine	OC[C@H]1O[C@H]([C@H](O)[C@@H]1O)N2C=CC(=O)NC2=O	245.1	147.414	-0.596423	0.5	1.2	0.6	1	2.1	2.8	3.5	-1.9	-3.9	-7	-11	-13.8	-16.2	-19.2	-20.3	-1.47	[-3.17:0.23]
Vamidothion	CNC(=O)C(C)SCCS[P](=O)(OC)OC	288.05	156.35	-0.05259	0.5	1.53451	3.35761	4.60467	6.07182	7.74975	9.62914	-1.49436	-2.62574	-4.08687	-5.54799	-5.64282	-5.65305	-5.11254	-3.88841	0.84	[0.76:0.84]
Venlafaxein	CN(C)CC(C1=CC=C(C=C1)OC)C2(CCCCC2)O	278.2	168.461	0.48	1.09	2.14	3.83	4.95146	6.28	7.83604	9.64									-3.9	[-4.97:-2.83]
Verapamil	COc1ccc(CCN(C)CCCC(C#N)(C(C)C)c2ccc(OC)c(OC)c2)cc1OC	455.3	217.97	1.03158	1.96566	3.57316	6.04199	7.66328	9.5127	10.2325	12.5008	1.6	2.3	3.6	5.6	6.8	8.4	10.2	12.1	-5.53	[-6.61:-4.45]
Vigabatrin	NC(CCC(O)=O)C=C	130	124.141	-0.986084	-2.04056	-3.04438	-3.61088	-3.566	-3.09669	-2.20029	-0.889106	-6.45	-11.8	-21.6	-32.4	-37.2	-41	-44	-45.1	0.74	[0.41:1.07]
Warfarin	CC(=O)CC(c1ccccc1)C2=C(O)Oc3ccccc3C2=O	309.1	168.89	0.348394	1.13324	2.42921	4.19657	5.32142	6.90665	8.6787	10.5512	-1.6	-3.4	-8.3	-11.5	-12.6	-12.8	-12.9	-11.5	-4.02	[-4.06:-3.98]
Xanthine	O=C1NC(=O)c2[nH]cnc2N1	153.1	129.641	-0.153728	-0.978652	-1.96198	-2.70023	-3.00855	-3.1695	-3.1493	-2.88832	-5.3	-9.8	-19.4	-32.4	-39.1	-46.0266	-51.5943	-54.5289	-3.33	[-3.38:-3.28]
Zolpidem	CN(C)C(=O)Cc1n2cc(C)ccc2nc1c3ccc(C)cc3	308	176.165	0.333014	0.862821	1.7925	3.24543	4.19581	5.38778	6.81462	8.63679	-0.35	-1.1	-2.2	-2.5	-2.3	-1.1	-0.1	1.1	-4.82	[-5.6:-4.04]
